# Supplementary material for: Multi-state models of transitions in depression and anxiety symptom severity and cardiovascular events in patients with coronary heart disease
Source: PubMed Central journal article supplement (PMC6405099; doi:10.1371/journal.pone.0213334), 2019-03-07
Supplement: pone.0213334.s001.pdf [file pone.0213334.s001.pdf]

|                        |
|------------------------|
| Age 1: <55 years old   |
| Age 2: 55-64 years old |
| Age 3: >64 years old   |

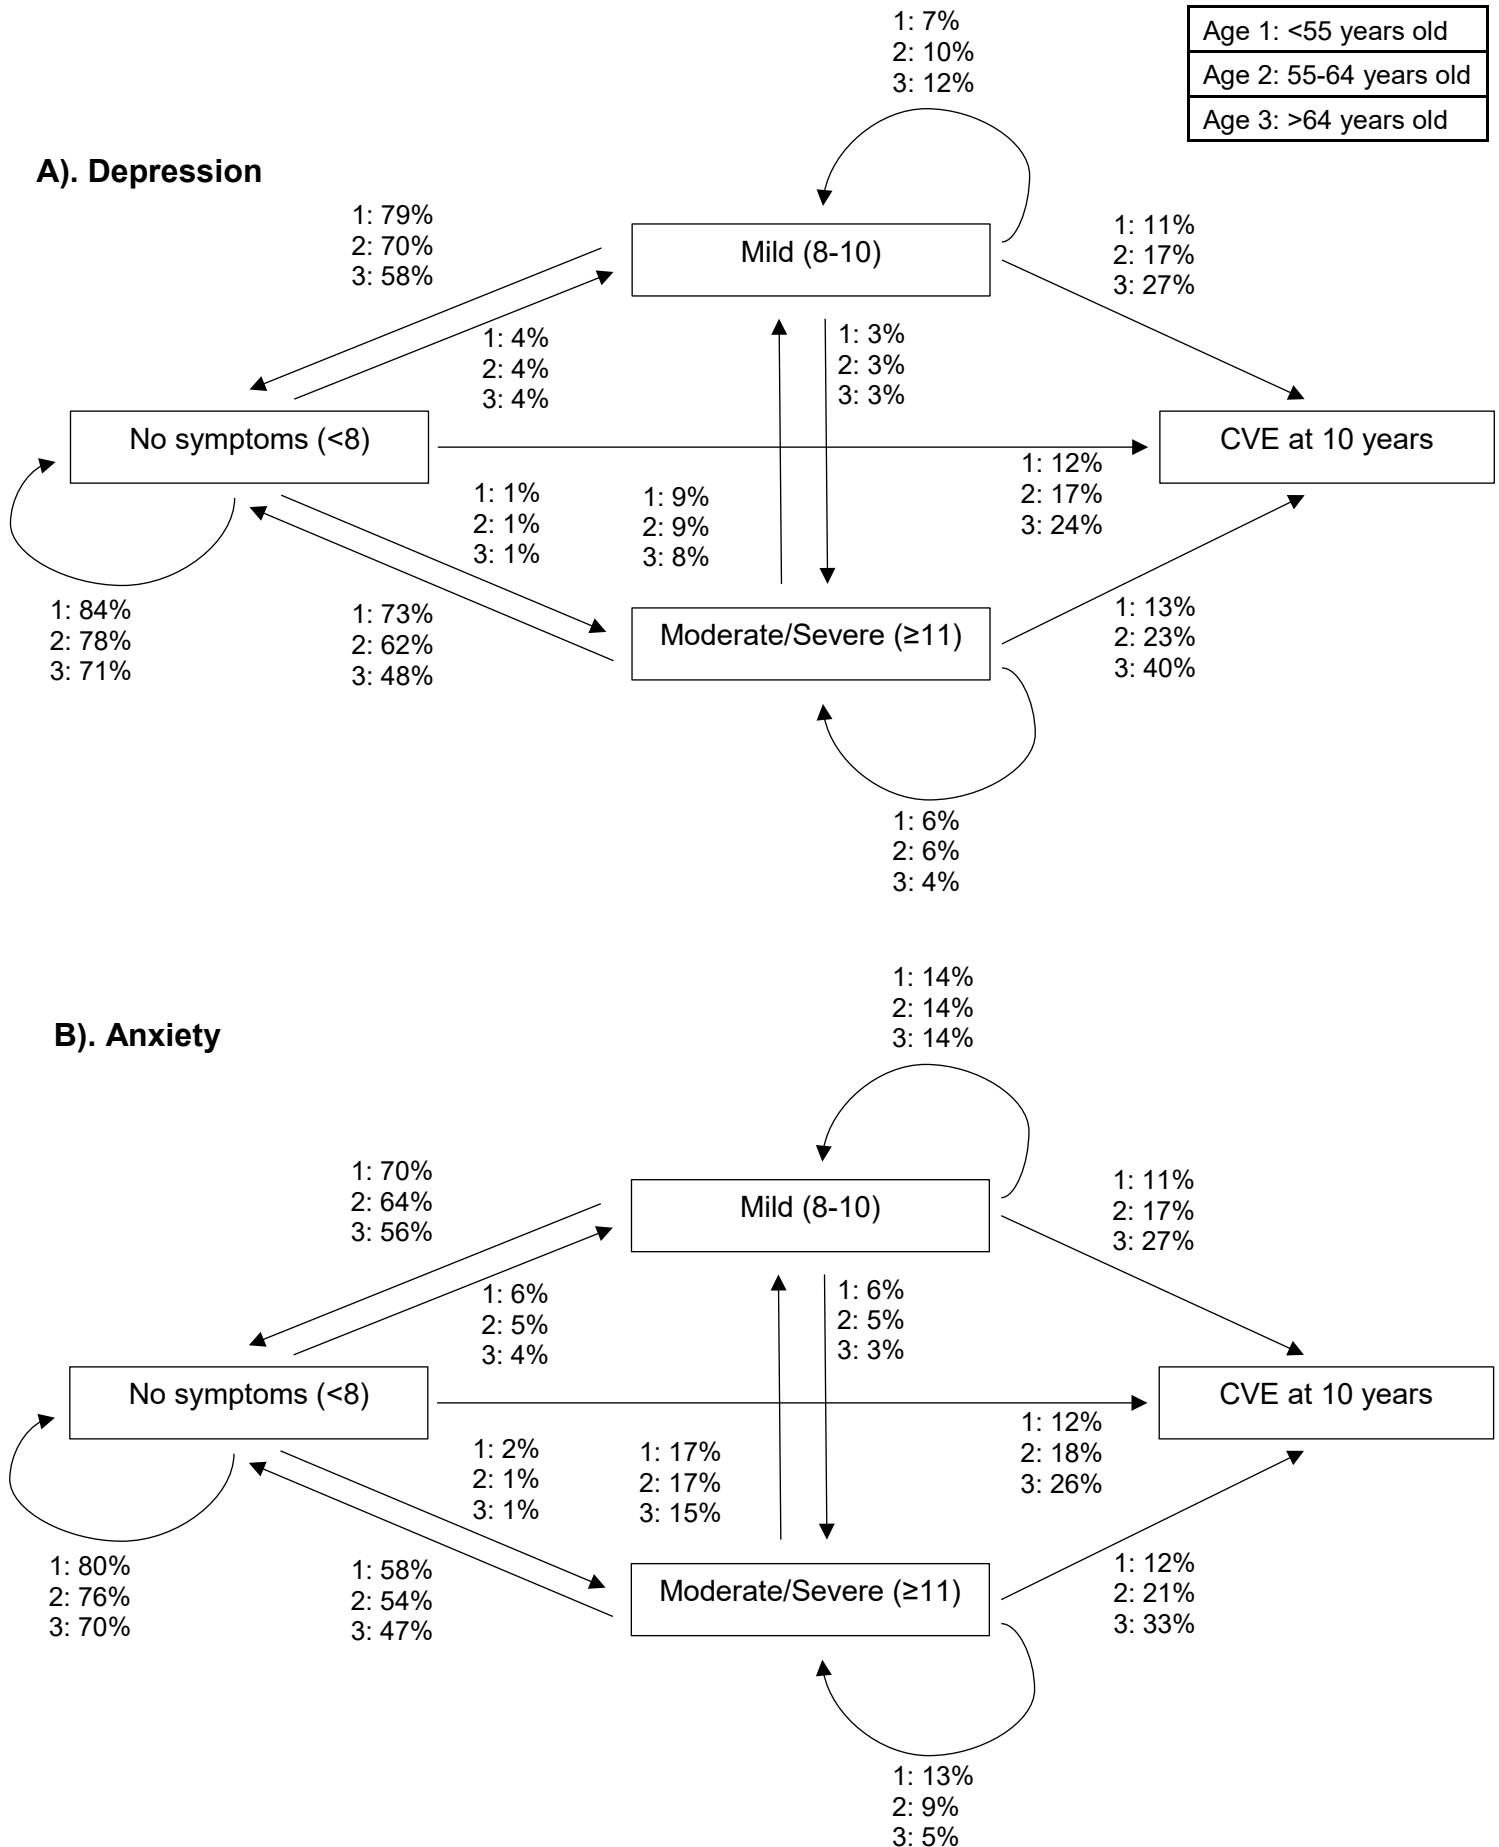

**Figure A. Transitions in (A) depression and (B) anxiety symptom severity over time from baseline level and transitions to a cardiovascular event (CVE) at 10 years by age group with gender, BMI, smoking, education, diabetes, history of myocardial infarction, physical activity, and anti-depression/anxiety medication; transition probabilities are shown at the reference level, N = 997.**

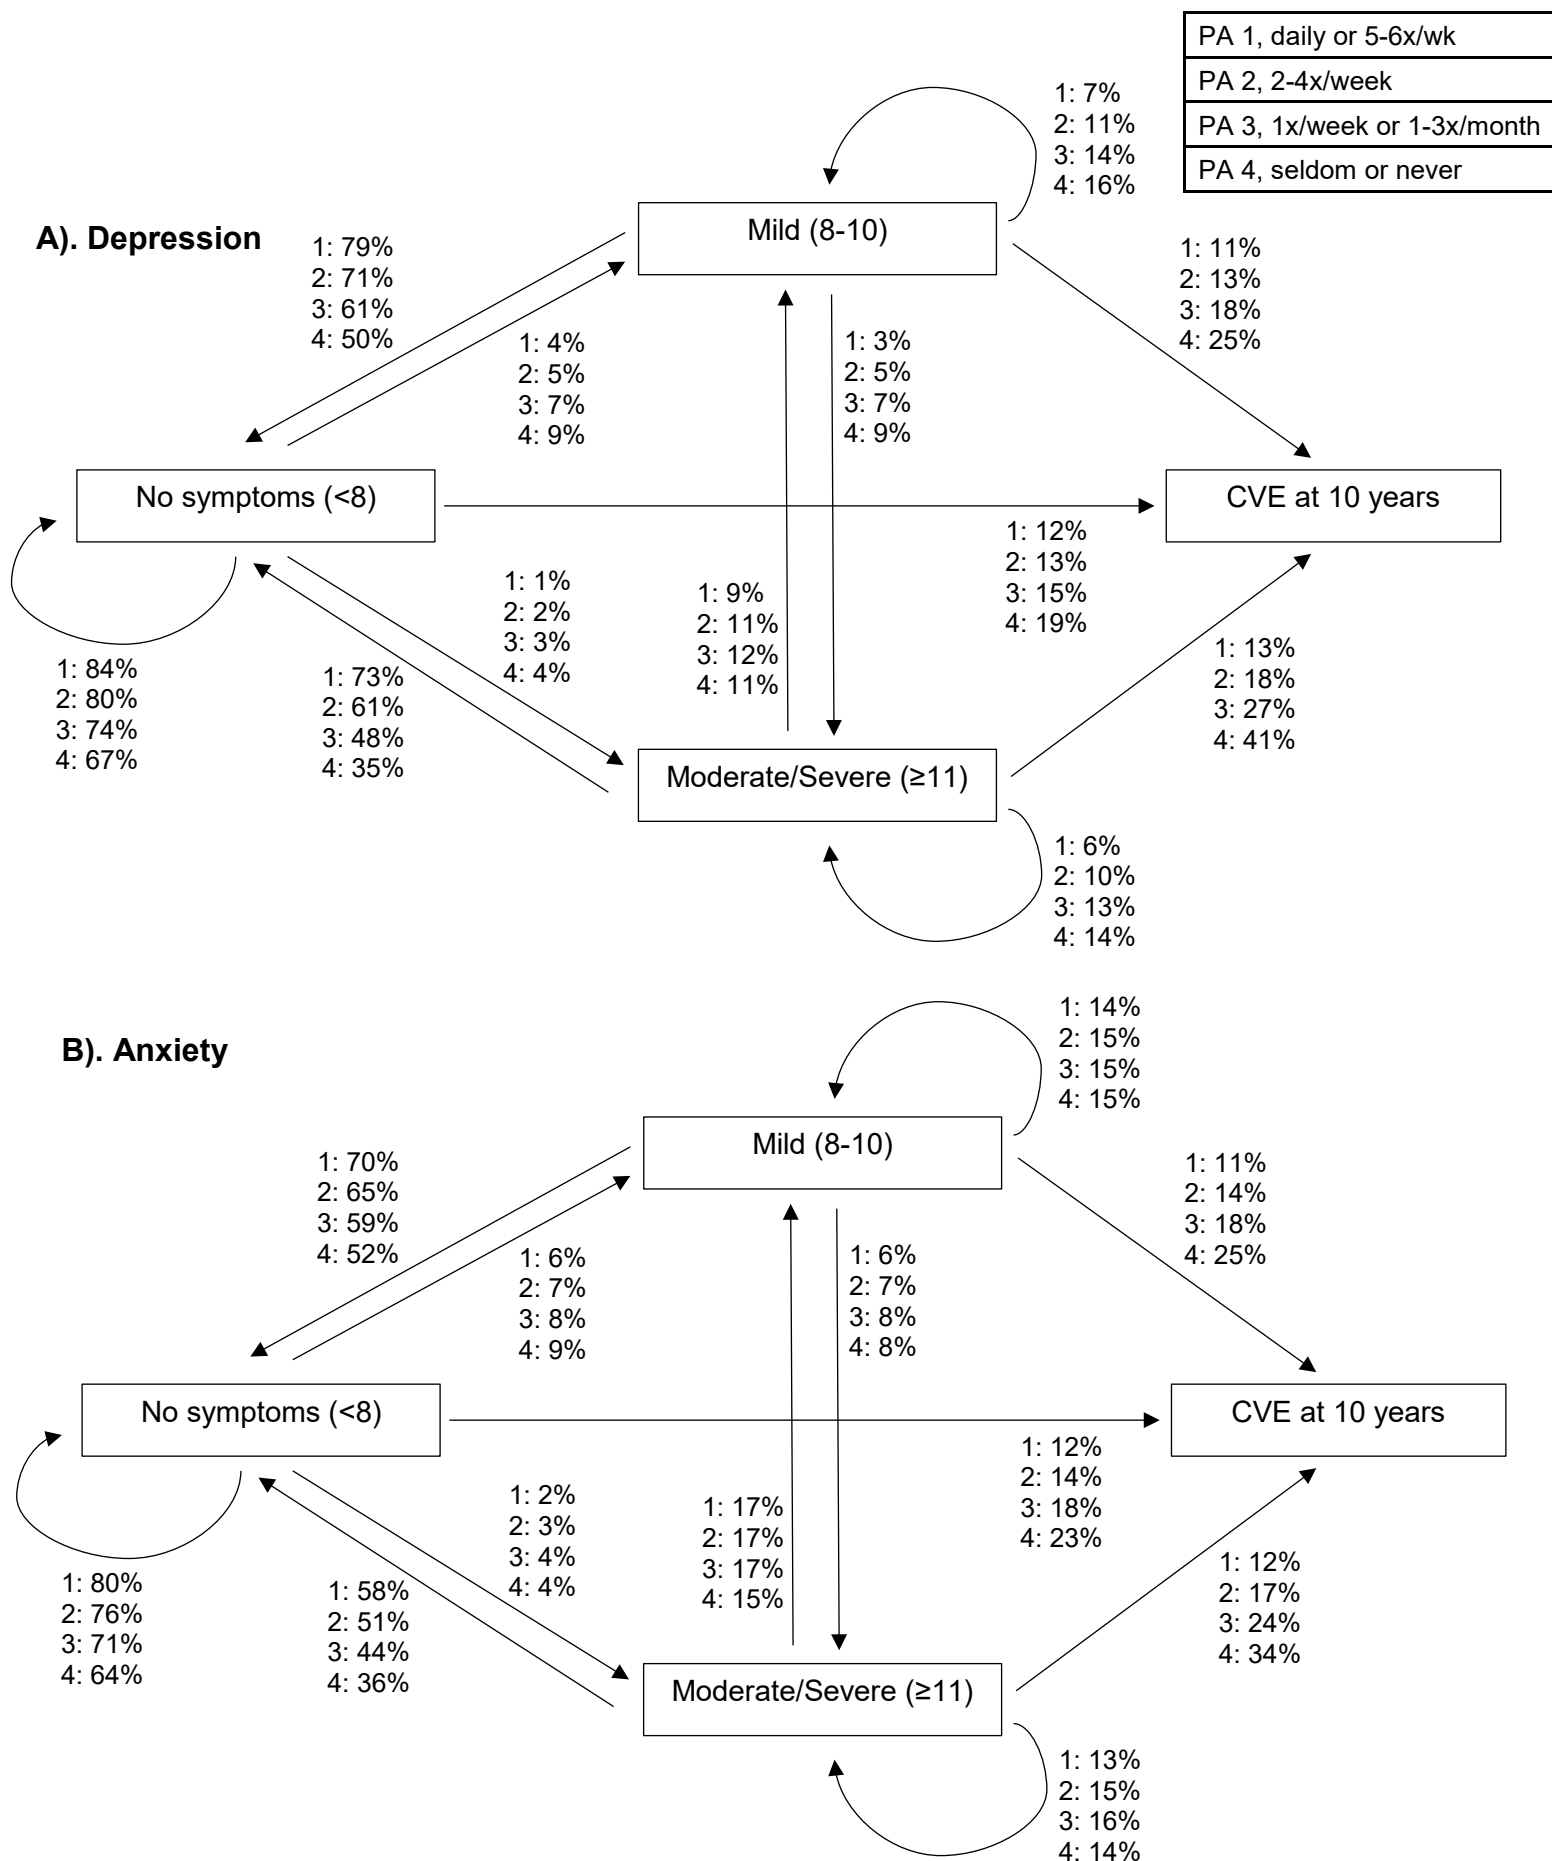

**Figure B. Transitions in (A) depression and (B) anxiety symptom severity over time from baseline level and transitions to a cardiovascular event (CVE) at 10 years by physical activity (PA) group with gender, BMI, smoking, education, diabetes, history of myocardial infarction, physical activity, and anti-depression/anxiety medication; transition probabilities are shown at the reference level, N = 997.**
