# Supplementary material for: Multi-state models of transitions in depression and anxiety symptom severity and cardiovascular events in patients with coronary heart disease
Source: PubMed Central journal article supplement (PMC6405099; doi:10.1371/journal.pone.0213334), 2019-03-07
Supplement: pone.0213334.s002.pdf [file pone.0213334.s002.pdf]

**Table A. Transitions between depression symptoms at baseline and depression symptoms or a cardiovascular event at 5 and 10 years by age group with gender, body mass index, smoking, education, diabetes, myocardial infarction, physical activity and anti-depression/anxiety medication; transition probabilities are shown at the reference level, N = 997.**

| Level of depression symptoms at baseline by age groups | N   | Transition probabilities (%) at 5 years |             |                       |      | Transition probabilities (%) at 10 years |             |                       |      |
|--------------------------------------------------------|-----|-----------------------------------------|-------------|-----------------------|------|------------------------------------------|-------------|-----------------------|------|
|                                                        |     | No symptoms (<8)                        | Mild (8-10) | Moderate/severe (≥11) | CVE  | No symptoms (<8)                         | Mild (8-10) | Moderate/severe (≥11) | CVE  |
| <b>No symptoms (&lt;8)</b>                             |     |                                         |             |                       |      |                                          |             |                       |      |
| < 55 yr                                                | 203 | 89.2                                    | 5.3         | 0.8                   | 4.6  | 83.7                                     | 3.8         | 1.0                   | 11.5 |
| 55 – 64 yr                                             | 383 | 86.9                                    | 5.4         | 1.0                   | 6.7  | 78.2                                     | 4.1         | 1.1                   | 16.5 |
| > 64 yr                                                | 241 | 83.9                                    | 5.3         | 0.9                   | 9.8  | 71.2                                     | 4.3         | 0.8                   | 23.7 |
| <b>Mild (8-10)</b>                                     |     |                                         |             |                       |      |                                          |             |                       |      |
| < 55 yr                                                | 26  | 63.0                                    | 27.4        | 5.8                   | 3.8  | 79.1                                     | 7.3         | 2.7                   | 10.8 |
| 55 – 64 yr                                             | 58  | 53.4                                    | 33.1        | 7.7                   | 5.9  | 69.7                                     | 10.1        | 3.4                   | 16.9 |
| > 64 yr                                                | 30  | 44.0                                    | 37.6        | 8.2                   | 10.3 | 57.6                                     | 12.4        | 2.8                   | 27.3 |
| <b>Moderate/severe (≥11)</b>                           |     |                                         |             |                       |      |                                          |             |                       |      |
| < 55 yr                                                | 21  | 48.4                                    | 24.3        | 22.4                  | 4.8  | 72.8                                     | 8.6         | 5.7                   | 12.9 |
| 55 – 64 yr                                             | 24  | 42.8                                    | 21.9        | 25.7                  | 9.6  | 61.6                                     | 9.3         | 6.0                   | 23.1 |
| > 64 yr                                                | 11  | 37.7                                    | 18.5        | 24.0                  | 19.8 | 48.0                                     | 8.2         | 3.5                   | 40.3 |

CVE: cardiovascular event; shaded area show same level of symptoms at baseline and during follow-up

**Table B. Transitions between severity of anxiety symptoms at baseline and anxiety symptoms or a cardiovascular event at 5 and 10 years by age group with gender, body mass index, smoking, education, diabetes, myocardial infarction, physical activity and anti-depression/anxiety medication; transition probabilities are shown at the reference level, N = 997.**

| Level of anxiety symptoms at baseline by age groups | N   | Probabilities (%) at 5 years |             |                       |      | Probabilities (%) at 10 years |             |                       |      |
|-----------------------------------------------------|-----|------------------------------|-------------|-----------------------|------|-------------------------------|-------------|-----------------------|------|
|                                                     |     | No symptoms (<8)             | Mild (8-10) | Moderate/severe (≥11) | CVE  | No symptoms (<8)              | Mild (8-10) | Moderate/severe (≥11) | CVE  |
| <b>No symptoms (&lt;8)</b>                          |     |                              |             |                       |      |                               |             |                       |      |
| < 55 yr                                             | 173 | 86.5                         | 7.2         | 1.7                   | 4.6  | 80.0                          | 6.4         | 1.9                   | 11.8 |
| 55 – 64 yr                                          | 361 | 85.8                         | 5.9         | 1.4                   | 6.9  | 76.0                          | 5.2         | 1.3                   | 17.5 |
| > 64 yr                                             | 231 | 83.9                         | 4.7         | 1.0                   | 10.4 | 69.8                          | 3.9         | 0.7                   | 25.6 |
| <b>Mild (8-10)</b>                                  |     |                              |             |                       |      |                               |             |                       |      |
| < 55 yr                                             | 46  | 53.9                         | 32.5        | 10.1                  | 3.5  | 69.5                          | 14.2        | 5.6                   | 10.7 |
| 55 – 64 yr                                          | 75  | 50.1                         | 33.4        | 10.7                  | 5.8  | 63.9                          | 14.3        | 4.7                   | 17.1 |
| > 64 yr                                             | 36  | 45.7                         | 33.8        | 10.6                  | 9.8  | 56.0                          | 13.7        | 3.1                   | 27.2 |
| <b>Moderate/severe (≥11)</b>                        |     |                              |             |                       |      |                               |             |                       |      |
| < 55 yr                                             | 31  | 32.9                         | 22.8        | 40.3                  | 4.1  | 58.0                          | 17.1        | 12.6                  | 12.3 |
| 55 – 64 yr                                          | 29  | 32.2                         | 24.9        | 35.4                  | 7.5  | 53.7                          | 16.9        | 8.8                   | 20.6 |
| > 64 yr                                             | 15  | 30.8                         | 26.5        | 29.0                  | 13.8 | 46.8                          | 15.3        | 4.6                   | 33.3 |

CVE: cardiovascular event; shaded area show same level of symptoms at baseline and during follow-up

**Table C. Transitions between depression symptoms at baseline or a cardiovascular event at 5 and 10 years by physical activity level at one year with gender, body mass index, smoking, education, diabetes, history of myocardial infarction, physical activity and anti-depression/anxiety medication; transition probabilities are shown at the reference level, N = 997.**

| Level of depression symptoms at baseline by physical activity level | N   | Transition probabilities (%) at 5 years |             |                       |      | Transition probabilities (%) at 10 years |             |                       |      |
|---------------------------------------------------------------------|-----|-----------------------------------------|-------------|-----------------------|------|------------------------------------------|-------------|-----------------------|------|
|                                                                     |     | No symptoms (<8)                        | Mild (8-10) | Moderate/severe (≥11) | CVE  | No symptoms (<8)                         | Mild (8-10) | Moderate/severe (≥11) | CVE  |
| <b>No symptoms (&lt;8)</b>                                          |     |                                         |             |                       |      |                                          |             |                       |      |
| PA level 1, daily or 5-6x/week                                      | 276 | 89.2                                    | 5.3         | 0.8                   | 4.6  | 83.7                                     | 3.8         | 1.0                   | 11.5 |
| PA level 2, 2-4x/week                                               | 351 | 86.4                                    | 6.9         | 1.5                   | 5.2  | 79.7                                     | 5.3         | 1.9                   | 13.1 |
| PA level 3, 1x/week or 1-3x/month                                   | 134 | 82.7                                    | 8.8         | 2.6                   | 5.9  | 74.3                                     | 7.2         | 3.1                   | 15.4 |
| PA level 4, seldom or never                                         | 63  | 77.9                                    | 11.0        | 4.1                   | 7.1  | 67.2                                     | 9.1         | 4.4                   | 19.3 |
| <b>Mild (8-10)</b>                                                  |     |                                         |             |                       |      |                                          |             |                       |      |
| PA level 1, daily or 5-6x/week                                      | 25  | 63.0                                    | 27.4        | 5.8                   | 3.8  | 79.1                                     | 7.3         | 2.7                   | 10.8 |
| PA level 2, 2-4x/week                                               | 42  | 54.1                                    | 32.4        | 9.1                   | 4.5  | 71.3                                     | 10.5        | 5.0                   | 13.2 |
| PA level 3, 1x/week or 1-3x/month                                   | 32  | 45.2                                    | 36.3        | 12.7                  | 5.8  | 61.4                                     | 13.5        | 7.4                   | 17.6 |
| PA level 4, seldom or never                                         | 15  | 36.8                                    | 38.8        | 16.1                  | 8.4  | 50.2                                     | 15.8        | 9.1                   | 25.0 |
| <b>Moderate/severe (≥11)</b>                                        |     |                                         |             |                       |      |                                          |             |                       |      |
| PA level 1, daily or 5-6x/week                                      | 9   | 48.4                                    | 24.3        | 22.4                  | 4.8  | 72.8                                     | 8.6         | 5.7                   | 12.9 |
| PA level 2, 2-4x/week                                               | 24  | 38.4                                    | 23.3        | 31.4                  | 7.0  | 61.1                                     | 10.8        | 9.8                   | 18.2 |
| PA level 3, 1x/week or 1-3x/month                                   | 14  | 29.5                                    | 20.7        | 39.0                  | 10.7 | 47.9                                     | 11.6        | 13.1                  | 27.4 |
| PA level 4, seldom or never                                         | 9   | 22.1                                    | 17.5        | 43.7                  | 16.7 | 34.8                                     | 10.8        | 13.7                  | 40.6 |

CVE: cardiovascular event; PA: physical activity measured at one year; shaded area show same level of symptoms at baseline and during follow-up

**Table D. Transitions between anxiety symptoms at baseline or a cardiovascular event at 5 and 10 years by physical activity level at one year by age group with gender, body mass index, smoking, education, diabetes, history of myocardial infarction, and anti-depression/anxiety medication; transition probabilities are shown at the reference level, N = 997.**

| Level of anxiety symptoms at baseline by physical activity level | N   | Transition probabilities (%) at 5 years |             |                       |      | Transition probabilities (%) at 10 years |             |                       |      |
|------------------------------------------------------------------|-----|-----------------------------------------|-------------|-----------------------|------|------------------------------------------|-------------|-----------------------|------|
|                                                                  |     | No symptoms (<8)                        | Mild (8-10) | Moderate/severe (≥11) | CVE  | No symptoms (<8)                         | Mild (8-10) | Moderate/severe (≥11) | CVE  |
| <b>No symptoms (&lt;8)</b>                                       |     |                                         |             |                       |      |                                          |             |                       |      |
| PA level 1, daily or 5-6x/week                                   | 243 | 86.5                                    | 7.2         | 1.7                   | 4.6  | 80.0                                     | 6.4         | 1.9                   | 11.8 |
| PA level 2, 2-4x/week                                            | 323 | 83.8                                    | 8.2         | 2.5                   | 5.5  | 75.8                                     | 7.2         | 2.6                   | 14.4 |
| PA level 3, 1x/week or 1-3x/month                                | 127 | 80.3                                    | 9.3         | 3.7                   | 6.7  | 70.7                                     | 8.0         | 3.5                   | 17.8 |
| PA level 4, seldom or never                                      | 69  | 76.0                                    | 10.4        | 5.3                   | 8.3  | 64.3                                     | 8.8         | 4.2                   | 22.7 |
| <b>Mild (8-10)</b>                                               |     |                                         |             |                       |      |                                          |             |                       |      |
| PA level 1, daily or 5-6x/week                                   | 54  | 53.9                                    | 32.5        | 10.1                  | 3.5  | 69.5                                     | 14.2        | 5.6                   | 10.7 |
| PA level 2, 2-4x/week                                            | 60  | 50.6                                    | 32.9        | 11.9                  | 4.5  | 64.5                                     | 14.8        | 6.8                   | 13.8 |
| PA level 3, 1x/week or 1-3x/month                                | 35  | 47.1                                    | 33.1        | 13.9                  | 5.9  | 58.8                                     | 15.2        | 7.7                   | 18.3 |
| PA level 4, seldom or never                                      | 8   | 43.3                                    | 32.9        | 15.8                  | 7.9  | 52.3                                     | 15.1        | 7.9                   | 24.7 |
| <b>Moderate/severe (≥11)</b>                                     |     |                                         |             |                       |      |                                          |             |                       |      |
| PA level 1, daily or 5-6x/week                                   | 13  | 32.9                                    | 22.8        | 40.3                  | 4.1  | 58.0                                     | 17.1        | 12.6                  | 12.3 |
| PA level 2, 2-4x/week                                            | 34  | 28.2                                    | 21.6        | 44.5                  | 5.8  | 51.0                                     | 17.2        | 14.6                  | 17.2 |
| PA level 3, 1x/week or 1-3x/month                                | 18  | 23.8                                    | 20.2        | 47.6                  | 8.3  | 43.6                                     | 16.6        | 15.5                  | 24.3 |
| PA level 4, seldom or never                                      | 10  | 19.9                                    | 18.6        | 49.3                  | 12.3 | 35.9                                     | 15.3        | 14.4                  | 34.4 |

CVE: cardiovascular event; PA: physical activity measured at one year; shaded area show same level of symptoms at baseline and during follow-up
