# Supplementary material for: Multi-state models of transitions in depression and anxiety symptom severity and cardiovascular events in patients with coronary heart disease
Source: PubMed Central journal article supplement (PMC6405099; doi:10.1371/journal.pone.0213334), 2019-03-07
Supplement: pone.0213334.s003.pdf [file pone.0213334.s003.pdf]



LANGZEITERFOLGE  
DER  
**KARDIOLOGISCHEN**  
ANSCHLUSSHEILBEHANDLUNG

**Patientenfragebogen**

- zu Beginn der Reha -

ID-Nummer:

Ausgabedatum: |\_|\_|.|\_|\_|.|\_|\_|\_|\_|\_| (Tag.Monat.Jahr)

Rückgabe bis zum: |\_|\_|.|\_|\_|.|\_|\_|\_|\_|\_|

Rückgabe am: |\_|\_|.|\_|\_|.|\_|\_|\_|\_|\_|

## Sehr geehrte Teilnehmerin, sehr geehrter Teilnehmer der **KAROLA-Studie!**

Sie sind zur Rehabilitation in diese Klinik gekommen, damit Ihre Gesundheit soweit wie möglich wiederhergestellt werden kann. Dazu möchten wir mit der **KAROLA**-Studie (Langzeiterfolge der **KARdiOLOGischen Anschlußheilbehandlung**) einen wesentlichen Beitrag leisten. Wie Ihnen bereits erklärt wurde, geht es in der Studie darum, zu untersuchen, wie kurzfristige Erfolge der stationären Rehabilitation den langfristigen Krankheitsverlauf und die damit verbundenen sozialen und beruflichen Konsequenzen beeinflussen. Um diese Untersuchung erfolgreich durchführen zu können, möchten wir Sie nun mit der Beantwortung des folgenden Fragebogens um Ihre aktive Mithilfe bitten. Alle Angaben werden selbstverständlich streng vertraulich behandelt und ausschließlich in pseudonymisierter Form ausgewertet.

Wir möchten Ihnen nun noch einige konkrete Hinweise zum Ausfüllen des Fragebogens geben:

Der Fragebogen ist in sechs Bereiche unterteilt, die z.B. Ihre Krankheit, Ihre Lebensgewohnheiten oder persönliche Angaben betreffen. **Bitte gehen Sie Frage für Frage sorgfältig durch und beantworten Sie alle Fragen vollständig.** Sind Sie sich bei der Beantwortung der einen oder anderen Frage nicht ganz sicher, so geben Sie bitte den aus Ihrer Sicht bestmöglichen Schätzwert an. Nur vollständig und gewissenhaft ausgefüllte Bögen sichern den Erfolg und die Qualität dieser Studie und liefern gültige Ergebnisse.

Falls Sie Probleme bei der Beantwortung haben, wenden Sie sich bitte an unsere Studienmitarbeiter im Hause. Auch wenn Sie sonst Fragen zu der Studie haben, stehen Ihnen unsere Mitarbeiter selbstverständlich zur Verfügung.

### So wird es gemacht:

**Bitte verwenden Sie nur einen blauen oder schwarzen Kugelschreiber!  
Schreiben Sie nur in GROSSBUCHSTABEN und nicht über die Kästchen hinaus!**

Beim Ausfüllen des Bogens machen Sie bitte in die vorgesehenen Kästchen jeweils ein Kreuz

z.B. Geschlecht:  Männlich  Weiblich

Wo es erforderlich ist, tragen Sie bitte Zahlen ein,

z.B. Geburtsjahr 

|   |   |   |   |
|---|---|---|---|
| 1 | 9 | 4 | 8 |
|---|---|---|---|

oder schreiben Sie einen Text in die dafür vorgesehene Zeile,

z.B. erlernter Beruf: .....M.A.U.R.E.R. ....

|  |
|--|
|  |
|--|

## 1. Ihre Person und Ihr derzeitiger Gesundheitszustand

1. Ihr Geschlecht:  männlich  weiblich

2. Welche Staatsangehörigkeit haben Sie?

Deutsch

Nicht Deutsch |\_|\_|\_|\_| tragen Sie hier bitte das Kfz-Kennzeichen Ihres Staates ein

3. Wann sind Sie geboren? |\_|\_| . |\_|\_| . |\_|\_|\_|\_|\_|

In welchem Land sind Sie geboren? .....

**Falls Sie nicht in Deutschland geboren sind:**

Seit wann leben Sie in Deutschland? seit |\_|\_|\_|\_|\_| (Jahresangabe)

4. Wann sind Sie zuletzt vor Ihrem Eintritt in diese Reha-Klinik zur stationären Behandlung im Krankenhaus gewesen?

Von |\_|\_| . |\_|\_| . |\_|\_|\_|\_|\_| bis |\_|\_| . |\_|\_| . |\_|\_|\_|\_|\_|  
Tag Monat Jahr Tag Monat Jahr

5. Was war der Grund dieses Krankenhausaufenthaltes?  
(Es sind mehrere Antworten möglich)

Herzrhythmusstörungen

Herzinfarkt

Operativer Eingriff am Herzen bzw. an den Herzkranzgefäßen

Angina pectoris (Druck- bzw. Engegefühl im Brustraum)

Sonstiges, nämlich: .....

|           |                                                                                                                                                                                                                                                                                                                                                                                                                                                                                                                                                                                                 |
|-----------|-------------------------------------------------------------------------------------------------------------------------------------------------------------------------------------------------------------------------------------------------------------------------------------------------------------------------------------------------------------------------------------------------------------------------------------------------------------------------------------------------------------------------------------------------------------------------------------------------|
| <b>6.</b> | <p>Welche Untersuchungen bzw. medizinischen Behandlungen wurden bei diesem Krankenhausaufenthalt durchgeführt?<br/>(Es sind mehrere Antworten möglich)</p> <ul style="list-style-type: none"><li><input type="checkbox"/> Koronarangiographie (Darstellung der Herzkranzgefäße mit Hilfe eines Kontrastmittels)</li><li><input type="checkbox"/> Koronarangioplastie (Aufdehnung von Engstellen der Herzkranzgefäße)</li><li><input type="checkbox"/> Stent-Implantation</li><li><input type="checkbox"/> Bypass-Operation</li><li><input type="checkbox"/> Sonstiges, nämlich: .....</li></ul> |
| <b>7.</b> | <p>Waren Sie zwischen diesem Krankenhausaufenthalt und Ihrem jetzigen Reha-Aufenthalt zu Hause?</p> <ul style="list-style-type: none"><li><input type="checkbox"/> ja</li><li><input type="checkbox"/> nein</li></ul>                                                                                                                                                                                                                                                                                                                                                                           |



|                                                                                                   |                                                                                                                     |                          |                          |                          |                          |                          |                          |
|---------------------------------------------------------------------------------------------------|---------------------------------------------------------------------------------------------------------------------|--------------------------|--------------------------|--------------------------|--------------------------|--------------------------|--------------------------|
| <b>10.</b>                                                                                        | Ihre derzeitigen alltäglichen Sorgen und Probleme:                                                                  |                          |                          |                          |                          |                          |                          |
|                                                                                                   |                                                                                                                     | <b>gar<br/>nicht</b>     | <b>sehr<br/>leicht</b>   | <b>leicht</b>            | <b>mäßig</b>             | <b>stark</b>             | <b>sehr<br/>stark</b>    |
|                                                                                                   | Machen Sie sich Sorgen um Ihre Gesundheit?                                                                          | <input type="checkbox"/> | <input type="checkbox"/> | <input type="checkbox"/> | <input type="checkbox"/> | <input type="checkbox"/> | <input type="checkbox"/> |
|                                                                                                   | <i>Falls berufstätig:</i><br>Wie sehr sorgen Sie sich, aus gesundheitlichen Gründen Ihren Beruf aufgeben zu müssen? | <input type="checkbox"/> | <input type="checkbox"/> | <input type="checkbox"/> | <input type="checkbox"/> | <input type="checkbox"/> | <input type="checkbox"/> |
| <i>Falls berufstätig:</i><br>Tragen Sie sich mit dem Gedanken, sich vorzeitig berenten zu lassen? | <input type="checkbox"/>                                                                                            | ja                       |                          | <input type="checkbox"/> | nein                     |                          |                          |

|            |                                                          |                               |                               |                                             |                                     |                                          |
|------------|----------------------------------------------------------|-------------------------------|-------------------------------|---------------------------------------------|-------------------------------------|------------------------------------------|
| <b>11.</b> | Ich erwarte von der bevorstehenden Reha...               |                               |                               |                                             |                                     |                                          |
|            |                                                          | <b>trifft<br/>voll<br/>zu</b> | <b>trifft<br/>eher<br/>zu</b> | <b>trifft<br/>teils zu,<br/>teils nicht</b> | <b>trifft<br/>eher<br/>nicht zu</b> | <b>trifft<br/>überhaupt<br/>nicht zu</b> |
|            | Wiederherstellung meiner Gesundheit                      | <input type="checkbox"/>      | <input type="checkbox"/>      | <input type="checkbox"/>                    | <input type="checkbox"/>            | <input type="checkbox"/>                 |
|            | Erholung                                                 | <input type="checkbox"/>      | <input type="checkbox"/>      | <input type="checkbox"/>                    | <input type="checkbox"/>            | <input type="checkbox"/>                 |
|            | Linderung von Beschwerden                                | <input type="checkbox"/>      | <input type="checkbox"/>      | <input type="checkbox"/>                    | <input type="checkbox"/>            | <input type="checkbox"/>                 |
|            | Aufklärung über meine Erkrankung und ihre Risikofaktoren | <input type="checkbox"/>      | <input type="checkbox"/>      | <input type="checkbox"/>                    | <input type="checkbox"/>            | <input type="checkbox"/>                 |
|            | Hilfe beim Umgang mit meiner Krankheit zu Hause          | <input type="checkbox"/>      | <input type="checkbox"/>      | <input type="checkbox"/>                    | <input type="checkbox"/>            | <input type="checkbox"/>                 |
|            | <b><i>Falls berufstätig:</i></b>                         |                               |                               |                                             |                                     |                                          |
|            | Verbesserung meiner Leistungsfähigkeit im Beruf          | <input type="checkbox"/>      | <input type="checkbox"/>      | <input type="checkbox"/>                    | <input type="checkbox"/>            | <input type="checkbox"/>                 |
|            | Ausübung meiner bish. berufl. Tätigkeit nach der Reha    | <input type="checkbox"/>      | <input type="checkbox"/>      | <input type="checkbox"/>                    | <input type="checkbox"/>            | <input type="checkbox"/>                 |
|            | Beratung über mögliche Probleme am Arbeitsplatz          | <input type="checkbox"/>      | <input type="checkbox"/>      | <input type="checkbox"/>                    | <input type="checkbox"/>            | <input type="checkbox"/>                 |
|            | Info über berufliche Umschulungsmöglichkeiten            | <input type="checkbox"/>      | <input type="checkbox"/>      | <input type="checkbox"/>                    | <input type="checkbox"/>            | <input type="checkbox"/>                 |



## 2. Ihre medizinische Vorgeschichte

|                                                   |                                                                                                                                                                                                                                                                                                                                                                                        |                                      |                          |
|---------------------------------------------------|----------------------------------------------------------------------------------------------------------------------------------------------------------------------------------------------------------------------------------------------------------------------------------------------------------------------------------------------------------------------------------------|--------------------------------------|--------------------------|
| 1.                                                | <p>Hat jemals ein <b>Arzt</b> bei Ihnen eine der folgenden Erkrankungen festgestellt?<br/>         Bitte machen Sie für jede der Erkrankungen (einschließlich Ihrer aktuellen Erkrankung) eine entsprechende Angabe. Falls eine Erkrankung <b>ärztlicherseits</b> festgestellt wurde, geben Sie bitte zusätzlich das Jahr an, in dem die Erkrankung erstmals diagnostiziert wurde.</p> |                                      |                          |
|                                                   |                                                                                                                                                                                                                                                                                                                                                                                        | <b>Jahr der erstmaligen Diagnose</b> |                          |
|                                                   | <b>ja</b>                                                                                                                                                                                                                                                                                                                                                                              | <b>durch einen Arzt</b>              | <b>nein</b>              |
| Durchblutungsstörungen am Herzen, Angina pectoris | <input type="checkbox"/>                                                                                                                                                                                                                                                                                                                                                               | _ _ _ _                              | <input type="checkbox"/> |
| Herzinfarkt                                       | <input type="checkbox"/>                                                                                                                                                                                                                                                                                                                                                               | _ _ _ _                              | <input type="checkbox"/> |
| Herzschwäche, Herzinsuffizienz                    | <input type="checkbox"/>                                                                                                                                                                                                                                                                                                                                                               | _ _ _ _                              | <input type="checkbox"/> |
| Durchblutungsstörungen am Gehirn                  | <input type="checkbox"/>                                                                                                                                                                                                                                                                                                                                                               | _ _ _ _                              | <input type="checkbox"/> |
| Schlaganfall                                      | <input type="checkbox"/>                                                                                                                                                                                                                                                                                                                                                               | _ _ _ _                              | <input type="checkbox"/> |
| Krampfadern, Venenentzündung                      | <input type="checkbox"/>                                                                                                                                                                                                                                                                                                                                                               | _ _ _ _                              | <input type="checkbox"/> |
| Thrombose                                         | <input type="checkbox"/>                                                                                                                                                                                                                                                                                                                                                               | _ _ _ _                              | <input type="checkbox"/> |
| Lungenembolie                                     | <input type="checkbox"/>                                                                                                                                                                                                                                                                                                                                                               | _ _ _ _                              | <input type="checkbox"/> |
| Bluthochdruck                                     | <input type="checkbox"/>                                                                                                                                                                                                                                                                                                                                                               | _ _ _ _                              | <input type="checkbox"/> |
| Zuckerkrankheit, Diabetes mellitus                | <input type="checkbox"/>                                                                                                                                                                                                                                                                                                                                                               | _ _ _ _                              | <input type="checkbox"/> |
| Gicht, Harnsäureerhöhung                          | <input type="checkbox"/>                                                                                                                                                                                                                                                                                                                                                               | _ _ _ _                              | <input type="checkbox"/> |
| Erhöhtes Cholesterin, erhöhte Blutfette           | <input type="checkbox"/>                                                                                                                                                                                                                                                                                                                                                               | _ _ _ _                              | <input type="checkbox"/> |
| Asthma                                            | <input type="checkbox"/>                                                                                                                                                                                                                                                                                                                                                               | _ _ _ _                              | <input type="checkbox"/> |
| Lungentuberkulose                                 | <input type="checkbox"/>                                                                                                                                                                                                                                                                                                                                                               | _ _ _ _                              | <input type="checkbox"/> |
| Gallenblasenentzündung oder Gallensteine          | <input type="checkbox"/>                                                                                                                                                                                                                                                                                                                                                               | _ _ _ _                              | <input type="checkbox"/> |
| Magen- oder Zwölffingerdarmgeschwür               | <input type="checkbox"/>                                                                                                                                                                                                                                                                                                                                                               | _ _ _ _                              | <input type="checkbox"/> |



|  |
|--|
|  |
|--|

|                                                                                 |                                                       |                                                       |         |                          |
|---------------------------------------------------------------------------------|-------------------------------------------------------|-------------------------------------------------------|---------|--------------------------|
| <b>1.</b>                                                                       | <i>Fortsetzung von Frage 1</i>                        | <b>Jahr der erstmaligen Diagnose durch einen Arzt</b> |         |                          |
|                                                                                 |                                                       | <b>ja</b>                                             |         | <b>nein</b>              |
|                                                                                 | Entzündung oder Steine der Blase, Niere oder Harnwege | <input type="checkbox"/>                              | _ _ _ _ | <input type="checkbox"/> |
|                                                                                 | Heuschnupfen                                          | <input type="checkbox"/>                              | _ _ _ _ | <input type="checkbox"/> |
|                                                                                 | Neurodermitis, atopisches Ekzem                       | <input type="checkbox"/>                              | _ _ _ _ | <input type="checkbox"/> |
|                                                                                 | Andere Allergien                                      | <input type="checkbox"/>                              | _ _ _ _ | <input type="checkbox"/> |
|                                                                                 | Krebserkrankungen                                     | <input type="checkbox"/>                              | _ _ _ _ | <input type="checkbox"/> |
| Krebserkrankungen: Falls ja, welche?                                            |                                                       |                                                       |         |                          |
| .....<br>(Bitte möglichst <b>genaue Angaben</b> , z.B. Lungenkrebs, Magenkrebs) |                                                       |                                                       |         |                          |

|                                   |                                                                                                                                                                                                                                                          |                          |                          |                          |
|-----------------------------------|----------------------------------------------------------------------------------------------------------------------------------------------------------------------------------------------------------------------------------------------------------|--------------------------|--------------------------|--------------------------|
| <b>2.</b>                         | Ist bei Ihnen jemals eine der folgenden Operationen oder einer der folgenden Eingriffe durchgeführt worden? Falls ja, in welchem Jahr?<br>(Falls mehrere solche Operationen durchgeführt wurden, geben Sie bitte das Jahr der erstmaligen Operation an). |                          |                          |                          |
|                                   |                                                                                                                                                                                                                                                          | <b>ja</b>                | <b>erstmalig im Jahr</b> | <b>nein</b>              |
|                                   | Bypass-Operation, Operation an den Herzkranzgefäßen                                                                                                                                                                                                      | <input type="checkbox"/> | _ _ _ _                  | <input type="checkbox"/> |
|                                   | Erweiterung der Herzkranzgefäße im Rahmen einer Untersuchung der Herzkranzgefäße (Koronarangiographie)                                                                                                                                                   | <input type="checkbox"/> | _ _ _ _                  | <input type="checkbox"/> |
|                                   | Krampfaderoperation                                                                                                                                                                                                                                      | <input type="checkbox"/> | _ _ _ _                  | <input type="checkbox"/> |
|                                   | Gallenblasenoperation                                                                                                                                                                                                                                    | <input type="checkbox"/> | _ _ _ _                  | <input type="checkbox"/> |
|                                   | Blinddarmoperation                                                                                                                                                                                                                                       | <input type="checkbox"/> | _ _ _ _                  | <input type="checkbox"/> |
|                                   | Mandeloperation                                                                                                                                                                                                                                          | <input type="checkbox"/> | _ _ _ _                  | <input type="checkbox"/> |
|                                   | Schilddrüsenoperation                                                                                                                                                                                                                                    | <input type="checkbox"/> | _ _ _ _                  | <input type="checkbox"/> |
|                                   | Magenoperation wegen Geschwüserkrankung, Ulcusleiden                                                                                                                                                                                                     | <input type="checkbox"/> | _ _ _ _                  | <input type="checkbox"/> |
| Krebsoperation                    | <input type="checkbox"/>                                                                                                                                                                                                                                 | _ _ _ _                  | <input type="checkbox"/> |                          |
| Krebsoperation: Falls ja, welche? |                                                                                                                                                                                                                                                          |                          |                          |                          |
| .....                             |                                                                                                                                                                                                                                                          |                          |                          |                          |

|                                                                                                          |                                                                                                            |                          |                             |                          |
|----------------------------------------------------------------------------------------------------------|------------------------------------------------------------------------------------------------------------|--------------------------|-----------------------------|--------------------------|
| <b>3.</b>                                                                                                | Wurden Ihnen ärztlicherseits jemals folgende Medikamente verordnet?<br>Falls ja, in welchem Jahr erstmals? |                          |                             |                          |
|                                                                                                          | Blutdrucksenkende Mittel                                                                                   | <b>ja</b>                | <b>erstmals<br/>im Jahr</b> | <b>nein</b>              |
|                                                                                                          |                                                                                                            | <input type="checkbox"/> | _ _ _ _ _                   | <input type="checkbox"/> |
|                                                                                                          | Tabletten zur Senkung des Blutzuckerspiegels                                                               | <input type="checkbox"/> | _ _ _ _ _                   | <input type="checkbox"/> |
|                                                                                                          | Insulin-Spritzen                                                                                           | <input type="checkbox"/> | _ _ _ _ _                   | <input type="checkbox"/> |
|                                                                                                          | Mittel zur Senkung des Blutfettspiegels                                                                    | <input type="checkbox"/> | _ _ _ _ _                   | <input type="checkbox"/> |
|                                                                                                          | Mittel zur Senkung des Harnsäurespiegels                                                                   | <input type="checkbox"/> | _ _ _ _ _                   | <input type="checkbox"/> |
| Antibiotika zur Ausrottung (Eradikation) einer<br>Infektion mit dem Magenkeim <i>Helicobacter pylori</i> | <input type="checkbox"/>                                                                                   | _ _ _ _ _                | <input type="checkbox"/>    |                          |

|           |                                                                                                                           |
|-----------|---------------------------------------------------------------------------------------------------------------------------|
| <b>4.</b> | Bitte schätzen Sie einmal, wie häufig bei Ihnen in den letzten 5 Jahren eine<br>Antibiotikabehandlung durchgeführt wurde. |
|           | <input type="checkbox"/> keine Behandlung                                                                                 |
|           | <input type="checkbox"/> 1 Behandlung                                                                                     |
|           | <input type="checkbox"/> 2-3 Behandlungen                                                                                 |
|           | <input type="checkbox"/> 4-10 Behandlungen                                                                                |
|           | <input type="checkbox"/> mehr als 10 Behandlungen                                                                         |

|  |
|--|
|  |
|--|

### 3. Angaben zu Ihrer Familie

|                                                              |                                                                                                                                                                                                                                                                                                                                                                                                                                                                                                                                                                                                                                                                                                                                                                                                                                                                                                                                                                                                                                                                                                                                                                                                                                                                                                                                                                                                                                                                                                                                                                                                                                                                                                                                                                                                                                                                                                                                                                                                                                                                                                                                                                                                                                                                                                                                                                                                                                                                                                                                                                                                                                                                                                                                                                                                                                                                                                                                                                                                                                                                                                                                                                                                                                                                                                                                                                                                                                                                                                                                                           |                                         |                          |                                         |                          |               |                          |                          |                          |              |                          |                          |                          |                                    |                          |                          |                          |                              |                          |                          |                          |           |                          |                          |                          |                                                              |                          |                          |                          |        |                          |                          |                          |                                     |                          |                          |                          |                 |                          |                          |                          |                                    |                                                                            |  |  |
|--------------------------------------------------------------|-----------------------------------------------------------------------------------------------------------------------------------------------------------------------------------------------------------------------------------------------------------------------------------------------------------------------------------------------------------------------------------------------------------------------------------------------------------------------------------------------------------------------------------------------------------------------------------------------------------------------------------------------------------------------------------------------------------------------------------------------------------------------------------------------------------------------------------------------------------------------------------------------------------------------------------------------------------------------------------------------------------------------------------------------------------------------------------------------------------------------------------------------------------------------------------------------------------------------------------------------------------------------------------------------------------------------------------------------------------------------------------------------------------------------------------------------------------------------------------------------------------------------------------------------------------------------------------------------------------------------------------------------------------------------------------------------------------------------------------------------------------------------------------------------------------------------------------------------------------------------------------------------------------------------------------------------------------------------------------------------------------------------------------------------------------------------------------------------------------------------------------------------------------------------------------------------------------------------------------------------------------------------------------------------------------------------------------------------------------------------------------------------------------------------------------------------------------------------------------------------------------------------------------------------------------------------------------------------------------------------------------------------------------------------------------------------------------------------------------------------------------------------------------------------------------------------------------------------------------------------------------------------------------------------------------------------------------------------------------------------------------------------------------------------------------------------------------------------------------------------------------------------------------------------------------------------------------------------------------------------------------------------------------------------------------------------------------------------------------------------------------------------------------------------------------------------------------------------------------------------------------------------------------------------------------|-----------------------------------------|--------------------------|-----------------------------------------|--------------------------|---------------|--------------------------|--------------------------|--------------------------|--------------|--------------------------|--------------------------|--------------------------|------------------------------------|--------------------------|--------------------------|--------------------------|------------------------------|--------------------------|--------------------------|--------------------------|-----------|--------------------------|--------------------------|--------------------------|--------------------------------------------------------------|--------------------------|--------------------------|--------------------------|--------|--------------------------|--------------------------|--------------------------|-------------------------------------|--------------------------|--------------------------|--------------------------|-----------------|--------------------------|--------------------------|--------------------------|------------------------------------|----------------------------------------------------------------------------|--|--|
| <b>1.</b>                                                    | In welchem Jahr ist <b>Ihr Vater</b> geboren?<br><br><div style="text-align: center; color: red;"> _ _ _ _ </div>                                                                                                                                                                                                                                                                                                                                                                                                                                                                                                                                                                                                                                                                                                                                                                                                                                                                                                                                                                                                                                                                                                                                                                                                                                                                                                                                                                                                                                                                                                                                                                                                                                                                                                                                                                                                                                                                                                                                                                                                                                                                                                                                                                                                                                                                                                                                                                                                                                                                                                                                                                                                                                                                                                                                                                                                                                                                                                                                                                                                                                                                                                                                                                                                                                                                                                                                                                                                                                         |                                         |                          |                                         |                          |               |                          |                          |                          |              |                          |                          |                          |                                    |                          |                          |                          |                              |                          |                          |                          |           |                          |                          |                          |                                                              |                          |                          |                          |        |                          |                          |                          |                                     |                          |                          |                          |                 |                          |                          |                          |                                    |                                                                            |  |  |
| <b>2.</b>                                                    | Lebt <b>Ihr Vater</b> noch? <input type="checkbox"/> ja<br><input type="checkbox"/> nein, er ist im Jahr <span style="color: red;"> _ _ _ _ </span><br>an ..... gestorben.                                                                                                                                                                                                                                                                                                                                                                                                                                                                                                                                                                                                                                                                                                                                                                                                                                                                                                                                                                                                                                                                                                                                                                                                                                                                                                                                                                                                                                                                                                                                                                                                                                                                                                                                                                                                                                                                                                                                                                                                                                                                                                                                                                                                                                                                                                                                                                                                                                                                                                                                                                                                                                                                                                                                                                                                                                                                                                                                                                                                                                                                                                                                                                                                                                                                                                                                                                                |                                         |                          |                                         |                          |               |                          |                          |                          |              |                          |                          |                          |                                    |                          |                          |                          |                              |                          |                          |                          |           |                          |                          |                          |                                                              |                          |                          |                          |        |                          |                          |                          |                                     |                          |                          |                          |                 |                          |                          |                          |                                    |                                                                            |  |  |
| <b>3.</b>                                                    | Welche der folgenden Erkrankungen wurden <b>bei Ihrem Vater</b> jemals <b>ärztlicherseits</b> festgestellt? (Bitte machen Sie für jede der Erkrankungen eine entsprechende Angabe)                                                                                                                                                                                                                                                                                                                                                                                                                                                                                                                                                                                                                                                                                                                                                                                                                                                                                                                                                                                                                                                                                                                                                                                                                                                                                                                                                                                                                                                                                                                                                                                                                                                                                                                                                                                                                                                                                                                                                                                                                                                                                                                                                                                                                                                                                                                                                                                                                                                                                                                                                                                                                                                                                                                                                                                                                                                                                                                                                                                                                                                                                                                                                                                                                                                                                                                                                                        |                                         |                          |                                         |                          |               |                          |                          |                          |              |                          |                          |                          |                                    |                          |                          |                          |                              |                          |                          |                          |           |                          |                          |                          |                                                              |                          |                          |                          |        |                          |                          |                          |                                     |                          |                          |                          |                 |                          |                          |                          |                                    |                                                                            |  |  |
|                                                              | <table style="margin-left: auto; margin-right: auto;"> <tr> <td style="padding: 0 10px;"><b>ja</b></td> <td style="padding: 0 10px;"><b>nein</b></td> <td style="padding: 0 10px;"><b>nicht bekannt<br/>weiß ich nicht</b></td> </tr> </table>                                                                                                                                                                                                                                                                                                                                                                                                                                                                                                                                                                                                                                                                                                                                                                                                                                                                                                                                                                                                                                                                                                                                                                                                                                                                                                                                                                                                                                                                                                                                                                                                                                                                                                                                                                                                                                                                                                                                                                                                                                                                                                                                                                                                                                                                                                                                                                                                                                                                                                                                                                                                                                                                                                                                                                                                                                                                                                                                                                                                                                                                                                                                                                                                                                                                                                            | <b>ja</b>                               | <b>nein</b>              | <b>nicht bekannt<br/>weiß ich nicht</b> |                          |               |                          |                          |                          |              |                          |                          |                          |                                    |                          |                          |                          |                              |                          |                          |                          |           |                          |                          |                          |                                                              |                          |                          |                          |        |                          |                          |                          |                                     |                          |                          |                          |                 |                          |                          |                          |                                    |                                                                            |  |  |
| <b>ja</b>                                                    | <b>nein</b>                                                                                                                                                                                                                                                                                                                                                                                                                                                                                                                                                                                                                                                                                                                                                                                                                                                                                                                                                                                                                                                                                                                                                                                                                                                                                                                                                                                                                                                                                                                                                                                                                                                                                                                                                                                                                                                                                                                                                                                                                                                                                                                                                                                                                                                                                                                                                                                                                                                                                                                                                                                                                                                                                                                                                                                                                                                                                                                                                                                                                                                                                                                                                                                                                                                                                                                                                                                                                                                                                                                                               | <b>nicht bekannt<br/>weiß ich nicht</b> |                          |                                         |                          |               |                          |                          |                          |              |                          |                          |                          |                                    |                          |                          |                          |                              |                          |                          |                          |           |                          |                          |                          |                                                              |                          |                          |                          |        |                          |                          |                          |                                     |                          |                          |                          |                 |                          |                          |                          |                                    |                                                                            |  |  |
|                                                              | <table style="width: 100%; border-collapse: collapse;"> <tr> <td style="width: 60%; padding: 5px;">Herzinfarkt</td> <td style="width: 10%; text-align: center; padding: 5px;"><input type="checkbox"/></td> <td style="width: 10%; text-align: center; padding: 5px;"><input type="checkbox"/></td> <td style="width: 20%; text-align: center; padding: 5px;"><input type="checkbox"/></td> </tr> <tr style="background-color: #f2f2f2;"> <td style="padding: 5px;">Bluthochdruck</td> <td style="text-align: center; padding: 5px;"><input type="checkbox"/></td> <td style="text-align: center; padding: 5px;"><input type="checkbox"/></td> <td style="text-align: center; padding: 5px;"><input type="checkbox"/></td> </tr> <tr> <td style="padding: 5px;">Schlaganfall</td> <td style="text-align: center; padding: 5px;"><input type="checkbox"/></td> <td style="text-align: center; padding: 5px;"><input type="checkbox"/></td> <td style="text-align: center; padding: 5px;"><input type="checkbox"/></td> </tr> <tr style="background-color: #f2f2f2;"> <td style="padding: 5px;">Zuckerkrankheit, Diabetes mellitus</td> <td style="text-align: center; padding: 5px;"><input type="checkbox"/></td> <td style="text-align: center; padding: 5px;"><input type="checkbox"/></td> <td style="text-align: center; padding: 5px;"><input type="checkbox"/></td> </tr> <tr> <td style="padding: 5px;">Krampfadern, Venenentzündung</td> <td style="text-align: center; padding: 5px;"><input type="checkbox"/></td> <td style="text-align: center; padding: 5px;"><input type="checkbox"/></td> <td style="text-align: center; padding: 5px;"><input type="checkbox"/></td> </tr> <tr style="background-color: #f2f2f2;"> <td style="padding: 5px;">Thrombose</td> <td style="text-align: center; padding: 5px;"><input type="checkbox"/></td> <td style="text-align: center; padding: 5px;"><input type="checkbox"/></td> <td style="text-align: center; padding: 5px;"><input type="checkbox"/></td> </tr> <tr> <td style="padding: 5px;">Schwere geistige Verwirrtheit, z.B. Alzheimersche Erkrankung</td> <td style="text-align: center; padding: 5px;"><input type="checkbox"/></td> <td style="text-align: center; padding: 5px;"><input type="checkbox"/></td> <td style="text-align: center; padding: 5px;"><input type="checkbox"/></td> </tr> <tr style="background-color: #f2f2f2;"> <td style="padding: 5px;">Asthma</td> <td style="text-align: center; padding: 5px;"><input type="checkbox"/></td> <td style="text-align: center; padding: 5px;"><input type="checkbox"/></td> <td style="text-align: center; padding: 5px;"><input type="checkbox"/></td> </tr> <tr> <td style="padding: 5px;">Magen- oder Zwölffingerdarmgeschwür</td> <td style="text-align: center; padding: 5px;"><input type="checkbox"/></td> <td style="text-align: center; padding: 5px;"><input type="checkbox"/></td> <td style="text-align: center; padding: 5px;"><input type="checkbox"/></td> </tr> <tr style="background-color: #f2f2f2;"> <td style="padding: 5px;">Krebserkrankung</td> <td style="text-align: center; padding: 5px;"><input type="checkbox"/></td> <td style="text-align: center; padding: 5px;"><input type="checkbox"/></td> <td style="text-align: center; padding: 5px;"><input type="checkbox"/></td> </tr> <tr> <td style="padding: 5px;">Krebserkrankung: Falls ja, welche?</td> <td colspan="3" style="padding: 5px;"> <div style="border-top: 1px dashed red; height: 15px; width: 100%;"></div> </td> </tr> </table> | Herzinfarkt                             | <input type="checkbox"/> | <input type="checkbox"/>                | <input type="checkbox"/> | Bluthochdruck | <input type="checkbox"/> | <input type="checkbox"/> | <input type="checkbox"/> | Schlaganfall | <input type="checkbox"/> | <input type="checkbox"/> | <input type="checkbox"/> | Zuckerkrankheit, Diabetes mellitus | <input type="checkbox"/> | <input type="checkbox"/> | <input type="checkbox"/> | Krampfadern, Venenentzündung | <input type="checkbox"/> | <input type="checkbox"/> | <input type="checkbox"/> | Thrombose | <input type="checkbox"/> | <input type="checkbox"/> | <input type="checkbox"/> | Schwere geistige Verwirrtheit, z.B. Alzheimersche Erkrankung | <input type="checkbox"/> | <input type="checkbox"/> | <input type="checkbox"/> | Asthma | <input type="checkbox"/> | <input type="checkbox"/> | <input type="checkbox"/> | Magen- oder Zwölffingerdarmgeschwür | <input type="checkbox"/> | <input type="checkbox"/> | <input type="checkbox"/> | Krebserkrankung | <input type="checkbox"/> | <input type="checkbox"/> | <input type="checkbox"/> | Krebserkrankung: Falls ja, welche? | <div style="border-top: 1px dashed red; height: 15px; width: 100%;"></div> |  |  |
| Herzinfarkt                                                  | <input type="checkbox"/>                                                                                                                                                                                                                                                                                                                                                                                                                                                                                                                                                                                                                                                                                                                                                                                                                                                                                                                                                                                                                                                                                                                                                                                                                                                                                                                                                                                                                                                                                                                                                                                                                                                                                                                                                                                                                                                                                                                                                                                                                                                                                                                                                                                                                                                                                                                                                                                                                                                                                                                                                                                                                                                                                                                                                                                                                                                                                                                                                                                                                                                                                                                                                                                                                                                                                                                                                                                                                                                                                                                                  | <input type="checkbox"/>                | <input type="checkbox"/> |                                         |                          |               |                          |                          |                          |              |                          |                          |                          |                                    |                          |                          |                          |                              |                          |                          |                          |           |                          |                          |                          |                                                              |                          |                          |                          |        |                          |                          |                          |                                     |                          |                          |                          |                 |                          |                          |                          |                                    |                                                                            |  |  |
| Bluthochdruck                                                | <input type="checkbox"/>                                                                                                                                                                                                                                                                                                                                                                                                                                                                                                                                                                                                                                                                                                                                                                                                                                                                                                                                                                                                                                                                                                                                                                                                                                                                                                                                                                                                                                                                                                                                                                                                                                                                                                                                                                                                                                                                                                                                                                                                                                                                                                                                                                                                                                                                                                                                                                                                                                                                                                                                                                                                                                                                                                                                                                                                                                                                                                                                                                                                                                                                                                                                                                                                                                                                                                                                                                                                                                                                                                                                  | <input type="checkbox"/>                | <input type="checkbox"/> |                                         |                          |               |                          |                          |                          |              |                          |                          |                          |                                    |                          |                          |                          |                              |                          |                          |                          |           |                          |                          |                          |                                                              |                          |                          |                          |        |                          |                          |                          |                                     |                          |                          |                          |                 |                          |                          |                          |                                    |                                                                            |  |  |
| Schlaganfall                                                 | <input type="checkbox"/>                                                                                                                                                                                                                                                                                                                                                                                                                                                                                                                                                                                                                                                                                                                                                                                                                                                                                                                                                                                                                                                                                                                                                                                                                                                                                                                                                                                                                                                                                                                                                                                                                                                                                                                                                                                                                                                                                                                                                                                                                                                                                                                                                                                                                                                                                                                                                                                                                                                                                                                                                                                                                                                                                                                                                                                                                                                                                                                                                                                                                                                                                                                                                                                                                                                                                                                                                                                                                                                                                                                                  | <input type="checkbox"/>                | <input type="checkbox"/> |                                         |                          |               |                          |                          |                          |              |                          |                          |                          |                                    |                          |                          |                          |                              |                          |                          |                          |           |                          |                          |                          |                                                              |                          |                          |                          |        |                          |                          |                          |                                     |                          |                          |                          |                 |                          |                          |                          |                                    |                                                                            |  |  |
| Zuckerkrankheit, Diabetes mellitus                           | <input type="checkbox"/>                                                                                                                                                                                                                                                                                                                                                                                                                                                                                                                                                                                                                                                                                                                                                                                                                                                                                                                                                                                                                                                                                                                                                                                                                                                                                                                                                                                                                                                                                                                                                                                                                                                                                                                                                                                                                                                                                                                                                                                                                                                                                                                                                                                                                                                                                                                                                                                                                                                                                                                                                                                                                                                                                                                                                                                                                                                                                                                                                                                                                                                                                                                                                                                                                                                                                                                                                                                                                                                                                                                                  | <input type="checkbox"/>                | <input type="checkbox"/> |                                         |                          |               |                          |                          |                          |              |                          |                          |                          |                                    |                          |                          |                          |                              |                          |                          |                          |           |                          |                          |                          |                                                              |                          |                          |                          |        |                          |                          |                          |                                     |                          |                          |                          |                 |                          |                          |                          |                                    |                                                                            |  |  |
| Krampfadern, Venenentzündung                                 | <input type="checkbox"/>                                                                                                                                                                                                                                                                                                                                                                                                                                                                                                                                                                                                                                                                                                                                                                                                                                                                                                                                                                                                                                                                                                                                                                                                                                                                                                                                                                                                                                                                                                                                                                                                                                                                                                                                                                                                                                                                                                                                                                                                                                                                                                                                                                                                                                                                                                                                                                                                                                                                                                                                                                                                                                                                                                                                                                                                                                                                                                                                                                                                                                                                                                                                                                                                                                                                                                                                                                                                                                                                                                                                  | <input type="checkbox"/>                | <input type="checkbox"/> |                                         |                          |               |                          |                          |                          |              |                          |                          |                          |                                    |                          |                          |                          |                              |                          |                          |                          |           |                          |                          |                          |                                                              |                          |                          |                          |        |                          |                          |                          |                                     |                          |                          |                          |                 |                          |                          |                          |                                    |                                                                            |  |  |
| Thrombose                                                    | <input type="checkbox"/>                                                                                                                                                                                                                                                                                                                                                                                                                                                                                                                                                                                                                                                                                                                                                                                                                                                                                                                                                                                                                                                                                                                                                                                                                                                                                                                                                                                                                                                                                                                                                                                                                                                                                                                                                                                                                                                                                                                                                                                                                                                                                                                                                                                                                                                                                                                                                                                                                                                                                                                                                                                                                                                                                                                                                                                                                                                                                                                                                                                                                                                                                                                                                                                                                                                                                                                                                                                                                                                                                                                                  | <input type="checkbox"/>                | <input type="checkbox"/> |                                         |                          |               |                          |                          |                          |              |                          |                          |                          |                                    |                          |                          |                          |                              |                          |                          |                          |           |                          |                          |                          |                                                              |                          |                          |                          |        |                          |                          |                          |                                     |                          |                          |                          |                 |                          |                          |                          |                                    |                                                                            |  |  |
| Schwere geistige Verwirrtheit, z.B. Alzheimersche Erkrankung | <input type="checkbox"/>                                                                                                                                                                                                                                                                                                                                                                                                                                                                                                                                                                                                                                                                                                                                                                                                                                                                                                                                                                                                                                                                                                                                                                                                                                                                                                                                                                                                                                                                                                                                                                                                                                                                                                                                                                                                                                                                                                                                                                                                                                                                                                                                                                                                                                                                                                                                                                                                                                                                                                                                                                                                                                                                                                                                                                                                                                                                                                                                                                                                                                                                                                                                                                                                                                                                                                                                                                                                                                                                                                                                  | <input type="checkbox"/>                | <input type="checkbox"/> |                                         |                          |               |                          |                          |                          |              |                          |                          |                          |                                    |                          |                          |                          |                              |                          |                          |                          |           |                          |                          |                          |                                                              |                          |                          |                          |        |                          |                          |                          |                                     |                          |                          |                          |                 |                          |                          |                          |                                    |                                                                            |  |  |
| Asthma                                                       | <input type="checkbox"/>                                                                                                                                                                                                                                                                                                                                                                                                                                                                                                                                                                                                                                                                                                                                                                                                                                                                                                                                                                                                                                                                                                                                                                                                                                                                                                                                                                                                                                                                                                                                                                                                                                                                                                                                                                                                                                                                                                                                                                                                                                                                                                                                                                                                                                                                                                                                                                                                                                                                                                                                                                                                                                                                                                                                                                                                                                                                                                                                                                                                                                                                                                                                                                                                                                                                                                                                                                                                                                                                                                                                  | <input type="checkbox"/>                | <input type="checkbox"/> |                                         |                          |               |                          |                          |                          |              |                          |                          |                          |                                    |                          |                          |                          |                              |                          |                          |                          |           |                          |                          |                          |                                                              |                          |                          |                          |        |                          |                          |                          |                                     |                          |                          |                          |                 |                          |                          |                          |                                    |                                                                            |  |  |
| Magen- oder Zwölffingerdarmgeschwür                          | <input type="checkbox"/>                                                                                                                                                                                                                                                                                                                                                                                                                                                                                                                                                                                                                                                                                                                                                                                                                                                                                                                                                                                                                                                                                                                                                                                                                                                                                                                                                                                                                                                                                                                                                                                                                                                                                                                                                                                                                                                                                                                                                                                                                                                                                                                                                                                                                                                                                                                                                                                                                                                                                                                                                                                                                                                                                                                                                                                                                                                                                                                                                                                                                                                                                                                                                                                                                                                                                                                                                                                                                                                                                                                                  | <input type="checkbox"/>                | <input type="checkbox"/> |                                         |                          |               |                          |                          |                          |              |                          |                          |                          |                                    |                          |                          |                          |                              |                          |                          |                          |           |                          |                          |                          |                                                              |                          |                          |                          |        |                          |                          |                          |                                     |                          |                          |                          |                 |                          |                          |                          |                                    |                                                                            |  |  |
| Krebserkrankung                                              | <input type="checkbox"/>                                                                                                                                                                                                                                                                                                                                                                                                                                                                                                                                                                                                                                                                                                                                                                                                                                                                                                                                                                                                                                                                                                                                                                                                                                                                                                                                                                                                                                                                                                                                                                                                                                                                                                                                                                                                                                                                                                                                                                                                                                                                                                                                                                                                                                                                                                                                                                                                                                                                                                                                                                                                                                                                                                                                                                                                                                                                                                                                                                                                                                                                                                                                                                                                                                                                                                                                                                                                                                                                                                                                  | <input type="checkbox"/>                | <input type="checkbox"/> |                                         |                          |               |                          |                          |                          |              |                          |                          |                          |                                    |                          |                          |                          |                              |                          |                          |                          |           |                          |                          |                          |                                                              |                          |                          |                          |        |                          |                          |                          |                                     |                          |                          |                          |                 |                          |                          |                          |                                    |                                                                            |  |  |
| Krebserkrankung: Falls ja, welche?                           | <div style="border-top: 1px dashed red; height: 15px; width: 100%;"></div>                                                                                                                                                                                                                                                                                                                                                                                                                                                                                                                                                                                                                                                                                                                                                                                                                                                                                                                                                                                                                                                                                                                                                                                                                                                                                                                                                                                                                                                                                                                                                                                                                                                                                                                                                                                                                                                                                                                                                                                                                                                                                                                                                                                                                                                                                                                                                                                                                                                                                                                                                                                                                                                                                                                                                                                                                                                                                                                                                                                                                                                                                                                                                                                                                                                                                                                                                                                                                                                                                |                                         |                          |                                         |                          |               |                          |                          |                          |              |                          |                          |                          |                                    |                          |                          |                          |                              |                          |                          |                          |           |                          |                          |                          |                                                              |                          |                          |                          |        |                          |                          |                          |                                     |                          |                          |                          |                 |                          |                          |                          |                                    |                                                                            |  |  |
|                                                              | (Bitte möglichst <b>genaue Angaben</b> , z.B. Lungen-, Magen-, Darm-, oder Nierenkrebs)                                                                                                                                                                                                                                                                                                                                                                                                                                                                                                                                                                                                                                                                                                                                                                                                                                                                                                                                                                                                                                                                                                                                                                                                                                                                                                                                                                                                                                                                                                                                                                                                                                                                                                                                                                                                                                                                                                                                                                                                                                                                                                                                                                                                                                                                                                                                                                                                                                                                                                                                                                                                                                                                                                                                                                                                                                                                                                                                                                                                                                                                                                                                                                                                                                                                                                                                                                                                                                                                   |                                         |                          |                                         |                          |               |                          |                          |                          |              |                          |                          |                          |                                    |                          |                          |                          |                              |                          |                          |                          |           |                          |                          |                          |                                                              |                          |                          |                          |        |                          |                          |                          |                                     |                          |                          |                          |                 |                          |                          |                          |                                    |                                                                            |  |  |

|                                                              |                                                                                                                                                                                                                                                                                                                                                                                                                                                                                                                                                                                                                                                                                                                                                                                                                                                                                                                                                                                                                                                                                                                                                                                                                                                                                                                                                                                                                                                                                                                                                                                                                                                                                                                                                                                                                                                                                                                                                                                                                                                                                                                                                                                                                                                                                                                                                                                                                                                                                                                                                                                                                                                               |                          |                          |                          |                          |               |                          |                          |                          |              |                          |                          |                          |                                    |                          |                          |                          |                              |                          |                          |                          |           |                          |                          |                          |                                                              |                          |                          |                          |        |                          |                          |                          |                                     |                          |                          |                          |                                                       |                          |                          |                          |
|--------------------------------------------------------------|---------------------------------------------------------------------------------------------------------------------------------------------------------------------------------------------------------------------------------------------------------------------------------------------------------------------------------------------------------------------------------------------------------------------------------------------------------------------------------------------------------------------------------------------------------------------------------------------------------------------------------------------------------------------------------------------------------------------------------------------------------------------------------------------------------------------------------------------------------------------------------------------------------------------------------------------------------------------------------------------------------------------------------------------------------------------------------------------------------------------------------------------------------------------------------------------------------------------------------------------------------------------------------------------------------------------------------------------------------------------------------------------------------------------------------------------------------------------------------------------------------------------------------------------------------------------------------------------------------------------------------------------------------------------------------------------------------------------------------------------------------------------------------------------------------------------------------------------------------------------------------------------------------------------------------------------------------------------------------------------------------------------------------------------------------------------------------------------------------------------------------------------------------------------------------------------------------------------------------------------------------------------------------------------------------------------------------------------------------------------------------------------------------------------------------------------------------------------------------------------------------------------------------------------------------------------------------------------------------------------------------------------------------------|--------------------------|--------------------------|--------------------------|--------------------------|---------------|--------------------------|--------------------------|--------------------------|--------------|--------------------------|--------------------------|--------------------------|------------------------------------|--------------------------|--------------------------|--------------------------|------------------------------|--------------------------|--------------------------|--------------------------|-----------|--------------------------|--------------------------|--------------------------|--------------------------------------------------------------|--------------------------|--------------------------|--------------------------|--------|--------------------------|--------------------------|--------------------------|-------------------------------------|--------------------------|--------------------------|--------------------------|-------------------------------------------------------|--------------------------|--------------------------|--------------------------|
| <b>4.</b>                                                    | In welchem Jahr ist <b>Ihre Mutter</b> geboren?  _ _ _ _                                                                                                                                                                                                                                                                                                                                                                                                                                                                                                                                                                                                                                                                                                                                                                                                                                                                                                                                                                                                                                                                                                                                                                                                                                                                                                                                                                                                                                                                                                                                                                                                                                                                                                                                                                                                                                                                                                                                                                                                                                                                                                                                                                                                                                                                                                                                                                                                                                                                                                                                                                                                      |                          |                          |                          |                          |               |                          |                          |                          |              |                          |                          |                          |                                    |                          |                          |                          |                              |                          |                          |                          |           |                          |                          |                          |                                                              |                          |                          |                          |        |                          |                          |                          |                                     |                          |                          |                          |                                                       |                          |                          |                          |
| <b>5.</b>                                                    | Lebt <b>Ihre Mutter</b> noch? <input type="checkbox"/> ja<br><input type="checkbox"/> nein, sie ist im Jahr  _ _ _ _ ,<br>an ..... gestorben                                                                                                                                                                                                                                                                                                                                                                                                                                                                                                                                                                                                                                                                                                                                                                                                                                                                                                                                                                                                                                                                                                                                                                                                                                                                                                                                                                                                                                                                                                                                                                                                                                                                                                                                                                                                                                                                                                                                                                                                                                                                                                                                                                                                                                                                                                                                                                                                                                                                                                                  |                          |                          |                          |                          |               |                          |                          |                          |              |                          |                          |                          |                                    |                          |                          |                          |                              |                          |                          |                          |           |                          |                          |                          |                                                              |                          |                          |                          |        |                          |                          |                          |                                     |                          |                          |                          |                                                       |                          |                          |                          |
| <b>6.</b>                                                    | Welche der folgenden Erkrankungen wurden <b>bei Ihrer Mutter</b> jemals<br><b>ärztlicherseits</b> festgestellt? (Bitte machen Sie für jede der Erkrankungen<br>eine entsprechende Angabe)                                                                                                                                                                                                                                                                                                                                                                                                                                                                                                                                                                                                                                                                                                                                                                                                                                                                                                                                                                                                                                                                                                                                                                                                                                                                                                                                                                                                                                                                                                                                                                                                                                                                                                                                                                                                                                                                                                                                                                                                                                                                                                                                                                                                                                                                                                                                                                                                                                                                     |                          |                          |                          |                          |               |                          |                          |                          |              |                          |                          |                          |                                    |                          |                          |                          |                              |                          |                          |                          |           |                          |                          |                          |                                                              |                          |                          |                          |        |                          |                          |                          |                                     |                          |                          |                          |                                                       |                          |                          |                          |
|                                                              | ja                      nein                      nicht bekannt<br>weiß ich nicht                                                                                                                                                                                                                                                                                                                                                                                                                                                                                                                                                                                                                                                                                                                                                                                                                                                                                                                                                                                                                                                                                                                                                                                                                                                                                                                                                                                                                                                                                                                                                                                                                                                                                                                                                                                                                                                                                                                                                                                                                                                                                                                                                                                                                                                                                                                                                                                                                                                                                                                                                                             |                          |                          |                          |                          |               |                          |                          |                          |              |                          |                          |                          |                                    |                          |                          |                          |                              |                          |                          |                          |           |                          |                          |                          |                                                              |                          |                          |                          |        |                          |                          |                          |                                     |                          |                          |                          |                                                       |                          |                          |                          |
|                                                              | <table style="width: 100%; border-collapse: collapse;"> <tr> <td style="width: 65%;">Herzinfarkt</td> <td style="width: 15%; text-align: center;"><input type="checkbox"/></td> <td style="width: 15%; text-align: center;"><input type="checkbox"/></td> <td style="width: 5%; text-align: center;"><input type="checkbox"/></td> </tr> <tr> <td>Bluthochdruck</td> <td style="text-align: center;"><input type="checkbox"/></td> <td style="text-align: center;"><input type="checkbox"/></td> <td style="text-align: center;"><input type="checkbox"/></td> </tr> <tr> <td>Schlaganfall</td> <td style="text-align: center;"><input type="checkbox"/></td> <td style="text-align: center;"><input type="checkbox"/></td> <td style="text-align: center;"><input type="checkbox"/></td> </tr> <tr> <td>Zuckerkrankheit, Diabetes mellitus</td> <td style="text-align: center;"><input type="checkbox"/></td> <td style="text-align: center;"><input type="checkbox"/></td> <td style="text-align: center;"><input type="checkbox"/></td> </tr> <tr> <td>Krampfadern, Venenentzündung</td> <td style="text-align: center;"><input type="checkbox"/></td> <td style="text-align: center;"><input type="checkbox"/></td> <td style="text-align: center;"><input type="checkbox"/></td> </tr> <tr> <td>Thrombose</td> <td style="text-align: center;"><input type="checkbox"/></td> <td style="text-align: center;"><input type="checkbox"/></td> <td style="text-align: center;"><input type="checkbox"/></td> </tr> <tr> <td>Schwere geistige Verwirrtheit, z.B. Alzheimersche Erkrankung</td> <td style="text-align: center;"><input type="checkbox"/></td> <td style="text-align: center;"><input type="checkbox"/></td> <td style="text-align: center;"><input type="checkbox"/></td> </tr> <tr> <td>Asthma</td> <td style="text-align: center;"><input type="checkbox"/></td> <td style="text-align: center;"><input type="checkbox"/></td> <td style="text-align: center;"><input type="checkbox"/></td> </tr> <tr> <td>Magen- oder Zwölffingerdarmgeschwür</td> <td style="text-align: center;"><input type="checkbox"/></td> <td style="text-align: center;"><input type="checkbox"/></td> <td style="text-align: center;"><input type="checkbox"/></td> </tr> <tr> <td>Krebserkrankung<br/>Krebserkrankung: Falls ja, welche?</td> <td style="text-align: center;"><input type="checkbox"/></td> <td style="text-align: center;"><input type="checkbox"/></td> <td style="text-align: center;"><input type="checkbox"/></td> </tr> </table> <p>.....</p> <p>(Bitte möglichst <b>genaue Angaben</b>, z.B. Lungen-, Magen-, Darm-, oder Brustkrebs)</p> | Herzinfarkt              | <input type="checkbox"/> | <input type="checkbox"/> | <input type="checkbox"/> | Bluthochdruck | <input type="checkbox"/> | <input type="checkbox"/> | <input type="checkbox"/> | Schlaganfall | <input type="checkbox"/> | <input type="checkbox"/> | <input type="checkbox"/> | Zuckerkrankheit, Diabetes mellitus | <input type="checkbox"/> | <input type="checkbox"/> | <input type="checkbox"/> | Krampfadern, Venenentzündung | <input type="checkbox"/> | <input type="checkbox"/> | <input type="checkbox"/> | Thrombose | <input type="checkbox"/> | <input type="checkbox"/> | <input type="checkbox"/> | Schwere geistige Verwirrtheit, z.B. Alzheimersche Erkrankung | <input type="checkbox"/> | <input type="checkbox"/> | <input type="checkbox"/> | Asthma | <input type="checkbox"/> | <input type="checkbox"/> | <input type="checkbox"/> | Magen- oder Zwölffingerdarmgeschwür | <input type="checkbox"/> | <input type="checkbox"/> | <input type="checkbox"/> | Krebserkrankung<br>Krebserkrankung: Falls ja, welche? | <input type="checkbox"/> | <input type="checkbox"/> | <input type="checkbox"/> |
| Herzinfarkt                                                  | <input type="checkbox"/>                                                                                                                                                                                                                                                                                                                                                                                                                                                                                                                                                                                                                                                                                                                                                                                                                                                                                                                                                                                                                                                                                                                                                                                                                                                                                                                                                                                                                                                                                                                                                                                                                                                                                                                                                                                                                                                                                                                                                                                                                                                                                                                                                                                                                                                                                                                                                                                                                                                                                                                                                                                                                                      | <input type="checkbox"/> | <input type="checkbox"/> |                          |                          |               |                          |                          |                          |              |                          |                          |                          |                                    |                          |                          |                          |                              |                          |                          |                          |           |                          |                          |                          |                                                              |                          |                          |                          |        |                          |                          |                          |                                     |                          |                          |                          |                                                       |                          |                          |                          |
| Bluthochdruck                                                | <input type="checkbox"/>                                                                                                                                                                                                                                                                                                                                                                                                                                                                                                                                                                                                                                                                                                                                                                                                                                                                                                                                                                                                                                                                                                                                                                                                                                                                                                                                                                                                                                                                                                                                                                                                                                                                                                                                                                                                                                                                                                                                                                                                                                                                                                                                                                                                                                                                                                                                                                                                                                                                                                                                                                                                                                      | <input type="checkbox"/> | <input type="checkbox"/> |                          |                          |               |                          |                          |                          |              |                          |                          |                          |                                    |                          |                          |                          |                              |                          |                          |                          |           |                          |                          |                          |                                                              |                          |                          |                          |        |                          |                          |                          |                                     |                          |                          |                          |                                                       |                          |                          |                          |
| Schlaganfall                                                 | <input type="checkbox"/>                                                                                                                                                                                                                                                                                                                                                                                                                                                                                                                                                                                                                                                                                                                                                                                                                                                                                                                                                                                                                                                                                                                                                                                                                                                                                                                                                                                                                                                                                                                                                                                                                                                                                                                                                                                                                                                                                                                                                                                                                                                                                                                                                                                                                                                                                                                                                                                                                                                                                                                                                                                                                                      | <input type="checkbox"/> | <input type="checkbox"/> |                          |                          |               |                          |                          |                          |              |                          |                          |                          |                                    |                          |                          |                          |                              |                          |                          |                          |           |                          |                          |                          |                                                              |                          |                          |                          |        |                          |                          |                          |                                     |                          |                          |                          |                                                       |                          |                          |                          |
| Zuckerkrankheit, Diabetes mellitus                           | <input type="checkbox"/>                                                                                                                                                                                                                                                                                                                                                                                                                                                                                                                                                                                                                                                                                                                                                                                                                                                                                                                                                                                                                                                                                                                                                                                                                                                                                                                                                                                                                                                                                                                                                                                                                                                                                                                                                                                                                                                                                                                                                                                                                                                                                                                                                                                                                                                                                                                                                                                                                                                                                                                                                                                                                                      | <input type="checkbox"/> | <input type="checkbox"/> |                          |                          |               |                          |                          |                          |              |                          |                          |                          |                                    |                          |                          |                          |                              |                          |                          |                          |           |                          |                          |                          |                                                              |                          |                          |                          |        |                          |                          |                          |                                     |                          |                          |                          |                                                       |                          |                          |                          |
| Krampfadern, Venenentzündung                                 | <input type="checkbox"/>                                                                                                                                                                                                                                                                                                                                                                                                                                                                                                                                                                                                                                                                                                                                                                                                                                                                                                                                                                                                                                                                                                                                                                                                                                                                                                                                                                                                                                                                                                                                                                                                                                                                                                                                                                                                                                                                                                                                                                                                                                                                                                                                                                                                                                                                                                                                                                                                                                                                                                                                                                                                                                      | <input type="checkbox"/> | <input type="checkbox"/> |                          |                          |               |                          |                          |                          |              |                          |                          |                          |                                    |                          |                          |                          |                              |                          |                          |                          |           |                          |                          |                          |                                                              |                          |                          |                          |        |                          |                          |                          |                                     |                          |                          |                          |                                                       |                          |                          |                          |
| Thrombose                                                    | <input type="checkbox"/>                                                                                                                                                                                                                                                                                                                                                                                                                                                                                                                                                                                                                                                                                                                                                                                                                                                                                                                                                                                                                                                                                                                                                                                                                                                                                                                                                                                                                                                                                                                                                                                                                                                                                                                                                                                                                                                                                                                                                                                                                                                                                                                                                                                                                                                                                                                                                                                                                                                                                                                                                                                                                                      | <input type="checkbox"/> | <input type="checkbox"/> |                          |                          |               |                          |                          |                          |              |                          |                          |                          |                                    |                          |                          |                          |                              |                          |                          |                          |           |                          |                          |                          |                                                              |                          |                          |                          |        |                          |                          |                          |                                     |                          |                          |                          |                                                       |                          |                          |                          |
| Schwere geistige Verwirrtheit, z.B. Alzheimersche Erkrankung | <input type="checkbox"/>                                                                                                                                                                                                                                                                                                                                                                                                                                                                                                                                                                                                                                                                                                                                                                                                                                                                                                                                                                                                                                                                                                                                                                                                                                                                                                                                                                                                                                                                                                                                                                                                                                                                                                                                                                                                                                                                                                                                                                                                                                                                                                                                                                                                                                                                                                                                                                                                                                                                                                                                                                                                                                      | <input type="checkbox"/> | <input type="checkbox"/> |                          |                          |               |                          |                          |                          |              |                          |                          |                          |                                    |                          |                          |                          |                              |                          |                          |                          |           |                          |                          |                          |                                                              |                          |                          |                          |        |                          |                          |                          |                                     |                          |                          |                          |                                                       |                          |                          |                          |
| Asthma                                                       | <input type="checkbox"/>                                                                                                                                                                                                                                                                                                                                                                                                                                                                                                                                                                                                                                                                                                                                                                                                                                                                                                                                                                                                                                                                                                                                                                                                                                                                                                                                                                                                                                                                                                                                                                                                                                                                                                                                                                                                                                                                                                                                                                                                                                                                                                                                                                                                                                                                                                                                                                                                                                                                                                                                                                                                                                      | <input type="checkbox"/> | <input type="checkbox"/> |                          |                          |               |                          |                          |                          |              |                          |                          |                          |                                    |                          |                          |                          |                              |                          |                          |                          |           |                          |                          |                          |                                                              |                          |                          |                          |        |                          |                          |                          |                                     |                          |                          |                          |                                                       |                          |                          |                          |
| Magen- oder Zwölffingerdarmgeschwür                          | <input type="checkbox"/>                                                                                                                                                                                                                                                                                                                                                                                                                                                                                                                                                                                                                                                                                                                                                                                                                                                                                                                                                                                                                                                                                                                                                                                                                                                                                                                                                                                                                                                                                                                                                                                                                                                                                                                                                                                                                                                                                                                                                                                                                                                                                                                                                                                                                                                                                                                                                                                                                                                                                                                                                                                                                                      | <input type="checkbox"/> | <input type="checkbox"/> |                          |                          |               |                          |                          |                          |              |                          |                          |                          |                                    |                          |                          |                          |                              |                          |                          |                          |           |                          |                          |                          |                                                              |                          |                          |                          |        |                          |                          |                          |                                     |                          |                          |                          |                                                       |                          |                          |                          |
| Krebserkrankung<br>Krebserkrankung: Falls ja, welche?        | <input type="checkbox"/>                                                                                                                                                                                                                                                                                                                                                                                                                                                                                                                                                                                                                                                                                                                                                                                                                                                                                                                                                                                                                                                                                                                                                                                                                                                                                                                                                                                                                                                                                                                                                                                                                                                                                                                                                                                                                                                                                                                                                                                                                                                                                                                                                                                                                                                                                                                                                                                                                                                                                                                                                                                                                                      | <input type="checkbox"/> | <input type="checkbox"/> |                          |                          |               |                          |                          |                          |              |                          |                          |                          |                                    |                          |                          |                          |                              |                          |                          |                          |           |                          |                          |                          |                                                              |                          |                          |                          |        |                          |                          |                          |                                     |                          |                          |                          |                                                       |                          |                          |                          |

**7.** Welchen **höchsten** Schulabschluss haben/hatten Ihre Eltern?

| <b>Ihr Vater:</b>                                      | <b>Ihre Mutter:</b>                                    |
|--------------------------------------------------------|--------------------------------------------------------|
| <input type="checkbox"/> Hauptschule/Volksschule       | <input type="checkbox"/> Hauptschule/Volksschule       |
| <input type="checkbox"/> Realschule/Mittlere Reife     | <input type="checkbox"/> Realschule/Mittlere Reife     |
| <input type="checkbox"/> Polytechnische Oberschule     | <input type="checkbox"/> Polytechnische Oberschule     |
| <input type="checkbox"/> Fachhochschulreife            | <input type="checkbox"/> Fachhochschulreife            |
| <input type="checkbox"/> Abitur / allg. Hochschulreife | <input type="checkbox"/> Abitur / allg. Hochschulreife |
| <input type="checkbox"/> anderen Schulabschluss        | <input type="checkbox"/> anderen Schulabschluss        |

welchen:

.....

|                                                |                                                |
|------------------------------------------------|------------------------------------------------|
| <input type="checkbox"/> keinen Schulabschluss | <input type="checkbox"/> keinen Schulabschluss |
|------------------------------------------------|------------------------------------------------|

**8.** Wie viele leibliche Geschwister haben oder hatten Sie?

Ich habe/hatte Geschwister |\_|\_| (Bitte Anzahl eintragen)

Ich habe keine Geschwister

*In diesem Fall machen Sie bitte weiter mit **Abschnitt 4.***

**9.** Wurde bei einem Ihrer Geschwister jemals **ärztlicherseits** eine der folgenden Erkrankungen festgestellt? Falls ja, geben Sie bitte an, bei wie vielen Ihrer Geschwister diese Erkrankung festgestellt wurde.

|                 |                          | <b>festgestellt bei:</b>                                          |                          |  |                                         |
|-----------------|--------------------------|-------------------------------------------------------------------|--------------------------|--|-----------------------------------------|
|                 | <b>ja</b>                | <b>Anzahl der<br/>Geschwister</b>                                 | <b>nein</b>              |  | <b>nicht bekannt<br/>weiß ich nicht</b> |
| Herzinfarkt     | <input type="checkbox"/> | <span style="border: 1px solid red; padding: 0 5px;"> _ _ </span> | <input type="checkbox"/> |  | <input type="checkbox"/>                |
| Schlaganfall    | <input type="checkbox"/> | <span style="border: 1px solid red; padding: 0 5px;"> _ _ </span> | <input type="checkbox"/> |  | <input type="checkbox"/>                |
| Krebserkrankung | <input type="checkbox"/> | <span style="border: 1px solid red; padding: 0 5px;"> _ _ </span> | <input type="checkbox"/> |  | <input type="checkbox"/>                |

**10.**

Bitte geben Sie für jedes Ihrer Geschwister das Geburtsjahr und das Geschlecht an. Bitte geben Sie auch an, ob Ihre Geschwister bereits verstorben sind und wenn ja, in welchem Jahr und woran.

Bitte füllen Sie für jedes Ihrer Geschwister eine Zeile aus.

| Geburtsjahr / Geschlecht |                                                            | Bereits verstorben?                                       | Wenn ja, Todesjahr: | Woran verstorben Todesursache: |
|--------------------------|------------------------------------------------------------|-----------------------------------------------------------|---------------------|--------------------------------|
| männlich weiblich        |                                                            |                                                           |                     |                                |
| 1.                       | _ _ _ _  <input type="checkbox"/> <input type="checkbox"/> | <input type="checkbox"/> nein <input type="checkbox"/> ja | _ _ _ _             | .....                          |
| männlich weiblich        |                                                            |                                                           |                     |                                |
| 2.                       | _ _ _ _  <input type="checkbox"/> <input type="checkbox"/> | <input type="checkbox"/> nein <input type="checkbox"/> ja | _ _ _ _             | .....                          |
| männlich weiblich        |                                                            |                                                           |                     |                                |
| 3.                       | _ _ _ _  <input type="checkbox"/> <input type="checkbox"/> | <input type="checkbox"/> nein <input type="checkbox"/> ja | _ _ _ _             | .....                          |
| männlich weiblich        |                                                            |                                                           |                     |                                |
| 4.                       | _ _ _ _  <input type="checkbox"/> <input type="checkbox"/> | <input type="checkbox"/> nein <input type="checkbox"/> ja | _ _ _ _             | .....                          |
| männlich weiblich        |                                                            |                                                           |                     |                                |
| 5.                       | _ _ _ _  <input type="checkbox"/> <input type="checkbox"/> | <input type="checkbox"/> nein <input type="checkbox"/> ja | _ _ _ _             | .....                          |
| männlich weiblich        |                                                            |                                                           |                     |                                |
| 6.                       | _ _ _ _  <input type="checkbox"/> <input type="checkbox"/> | <input type="checkbox"/> nein <input type="checkbox"/> ja | _ _ _ _             | .....                          |
| männlich weiblich        |                                                            |                                                           |                     |                                |
| 7.                       | _ _ _ _  <input type="checkbox"/> <input type="checkbox"/> | <input type="checkbox"/> nein <input type="checkbox"/> ja | _ _ _ _             | .....                          |
| männlich weiblich        |                                                            |                                                           |                     |                                |
| 8.                       | _ _ _ _  <input type="checkbox"/> <input type="checkbox"/> | <input type="checkbox"/> nein <input type="checkbox"/> ja | _ _ _ _             | .....                          |
| männlich weiblich        |                                                            |                                                           |                     |                                |
| 9.                       | _ _ _ _  <input type="checkbox"/> <input type="checkbox"/> | <input type="checkbox"/> nein <input type="checkbox"/> ja | _ _ _ _             | .....                          |
| männlich weiblich        |                                                            |                                                           |                     |                                |
| 10.                      | _ _ _ _  <input type="checkbox"/> <input type="checkbox"/> | <input type="checkbox"/> nein <input type="checkbox"/> ja | _ _ _ _             | .....                          |
| männlich weiblich        |                                                            |                                                           |                     |                                |
| 11.                      | _ _ _ _  <input type="checkbox"/> <input type="checkbox"/> | <input type="checkbox"/> nein <input type="checkbox"/> ja | _ _ _ _             | .....                          |
| männlich weiblich        |                                                            |                                                           |                     |                                |
| 12.                      | _ _ _ _  <input type="checkbox"/> <input type="checkbox"/> | <input type="checkbox"/> nein <input type="checkbox"/> ja | _ _ _ _             | .....                          |
| männlich weiblich        |                                                            |                                                           |                     |                                |
| 13.                      | _ _ _ _  <input type="checkbox"/> <input type="checkbox"/> | <input type="checkbox"/> nein <input type="checkbox"/> ja | _ _ _ _             | .....                          |
| männlich weiblich        |                                                            |                                                           |                     |                                |
| 14.                      | _ _ _ _  <input type="checkbox"/> <input type="checkbox"/> | <input type="checkbox"/> nein <input type="checkbox"/> ja | _ _ _ _             | .....                          |

|  |
|--|
|  |
|--|

## 4. Ihre Ausbildung und Berufstätigkeit

1. Welchen **höchsten** Schulabschluss haben Sie?

- Hauptschule/Volksschule
- Realschule/Mittlere Reife
- Polytechnische Oberschule
- Fachhochschulreife
- Abitur / allgemeine Hochschulreife
- anderer Schulabschluss: .....
- keinen Schulabschluss

2. Haben Sie eine abgeschlossene Berufsausbildung? (Bei mehreren Ausbildungen bitte die **zuletzt** abgeschlossene Ausbildung eintragen)

- gewerbliche oder landwirtschaftliche Lehre
- kaufmännische oder sonstige Lehre
- Berufsfachschule, Handelsschule
- Fachschule (z.B. Meister, Techniker)
- Beamtenausbildung
- Fachhochschule, Ingenieurschule
- Universität, Hochschule
- sonstiger Ausbildungsabschluss: .....
- keine abgeschlossene Ausbildung

|           |                                                                                                                                                                                                                                                                                                                                                                                                                                                                                                                                                                                                                                                                                                                                                                                                                                                                                                                                                                                                                                                                                                                                                                                                                     |
|-----------|---------------------------------------------------------------------------------------------------------------------------------------------------------------------------------------------------------------------------------------------------------------------------------------------------------------------------------------------------------------------------------------------------------------------------------------------------------------------------------------------------------------------------------------------------------------------------------------------------------------------------------------------------------------------------------------------------------------------------------------------------------------------------------------------------------------------------------------------------------------------------------------------------------------------------------------------------------------------------------------------------------------------------------------------------------------------------------------------------------------------------------------------------------------------------------------------------------------------|
| <b>3.</b> | <p>Waren Sie zuletzt (d.h. bevor Sie im Akutkrankenhaus gewesen sind) berufstätig?</p> <p><input type="checkbox"/> ja, voll berufstätig</p> <p><input type="checkbox"/> ja, in Teilzeit berufstätig, mindestens halbtags</p> <p><input type="checkbox"/> ja, stundenweise berufstätig</p> <p><input type="checkbox"/> nein, arbeitslos, seit: <input type="text"/>.<input type="text"/><input type="text"/><input type="text"/><input type="text"/> (Monat/Jahr)</p> <p><input type="checkbox"/> nein, Hausfrau/Hausmann</p> <p><input type="checkbox"/> nein, in Ausbildung</p> <p><input type="checkbox"/> nein, altershalber in Rente/pensioniert, seit: <input type="text"/>.<input type="text"/><input type="text"/><input type="text"/><input type="text"/> (Monat/Jahr)</p> <p><input type="checkbox"/> nein, vorzeitig aus gesundheitlichen Gründen in Rente,<br/>seit: <input type="text"/>.<input type="text"/><input type="text"/><input type="text"/><input type="text"/> (Monat/Jahr)</p> <p><input type="checkbox"/> nein, vorzeitig aus sonstigen Gründen in Rente,<br/>seit: <input type="text"/>.<input type="text"/><input type="text"/><input type="text"/><input type="text"/> (Monat/Jahr)</p> |
|-----------|---------------------------------------------------------------------------------------------------------------------------------------------------------------------------------------------------------------------------------------------------------------------------------------------------------------------------------------------------------------------------------------------------------------------------------------------------------------------------------------------------------------------------------------------------------------------------------------------------------------------------------------------------------------------------------------------------------------------------------------------------------------------------------------------------------------------------------------------------------------------------------------------------------------------------------------------------------------------------------------------------------------------------------------------------------------------------------------------------------------------------------------------------------------------------------------------------------------------|

|           |                                                                                                                                                                                                                                                                                                                                                                   |
|-----------|-------------------------------------------------------------------------------------------------------------------------------------------------------------------------------------------------------------------------------------------------------------------------------------------------------------------------------------------------------------------|
| <b>4.</b> | <p>Wann - in welchem Jahr - waren Sie zum ersten Mal hauptberuflich (mindestens halbtags) erwerbstätig?</p> <p><input type="text"/><input type="text"/><input type="text"/><input type="text"/><input type="text"/> (Jahr)</p> <p><input type="checkbox"/> bin nie erwerbstätig gewesen<br/><i>In diesem Fall machen Sie bitte weiter mit <b>Frage 11</b></i></p> |
|-----------|-------------------------------------------------------------------------------------------------------------------------------------------------------------------------------------------------------------------------------------------------------------------------------------------------------------------------------------------------------------------|

|           |                                                                                                                                                                 |
|-----------|-----------------------------------------------------------------------------------------------------------------------------------------------------------------|
| <b>5.</b> | <p>Wie viele Jahre sind/waren Sie <i>insgesamt</i> hauptberuflich (mindestens halbtags) erwerbstätig?</p> <p><input type="text"/><input type="text"/> Jahre</p> |
|-----------|-----------------------------------------------------------------------------------------------------------------------------------------------------------------|

|           |                                                                                                                                                                                                                                |
|-----------|--------------------------------------------------------------------------------------------------------------------------------------------------------------------------------------------------------------------------------|
| <b>6.</b> | <p>Welche berufliche Tätigkeit üben Sie zur Zeit aus bzw. (falls nicht mehr berufstätig) haben Sie zuletzt ausgeübt? Machen Sie bitte möglichst genaue Angaben (z.B. <i>CHEMIEARBEITER IM SCHICHTBETRIEB</i>)</p> <p>.....</p> |
|-----------|--------------------------------------------------------------------------------------------------------------------------------------------------------------------------------------------------------------------------------|



|  |
|--|
|  |
|--|

|           |                                                                                                                                                                                                                                                            |
|-----------|------------------------------------------------------------------------------------------------------------------------------------------------------------------------------------------------------------------------------------------------------------|
| <b>7.</b> | Entspricht Ihre derzeitige bzw. letzte berufliche Tätigkeit Ihrem ursprünglich erlernten Beruf?<br><input type="checkbox"/> ja<br><input type="checkbox"/> nein, mein erlernter Beruf ist: .....<br><input type="checkbox"/> ich habe keinen Beruf erlernt |
|-----------|------------------------------------------------------------------------------------------------------------------------------------------------------------------------------------------------------------------------------------------------------------|

|           |                                                                                                                                                                                                                                                                                                                                                                        |
|-----------|------------------------------------------------------------------------------------------------------------------------------------------------------------------------------------------------------------------------------------------------------------------------------------------------------------------------------------------------------------------------|
| <b>8.</b> | Welche hauptberufliche Tätigkeit haben Sie am längsten ausgeübt?<br><input type="checkbox"/> die derzeitige, zuletzt ausgeübte<br><input type="checkbox"/> meinen ursprünglich erlernten Beruf<br><input type="checkbox"/> eine andere Tätigkeit, nämlich: .....<br><br>Wie lange haben Sie diese Tätigkeit hauptberuflich (mindestens halbtags) ausgeübt?  _ _  Jahre |
|-----------|------------------------------------------------------------------------------------------------------------------------------------------------------------------------------------------------------------------------------------------------------------------------------------------------------------------------------------------------------------------------|

|           |                                                                                                                                                                                                                                                                                                                                       |
|-----------|---------------------------------------------------------------------------------------------------------------------------------------------------------------------------------------------------------------------------------------------------------------------------------------------------------------------------------------|
| <b>9.</b> | In welcher beruflichen Stellung sind Sie derzeit bzw. (falls nicht mehr berufstätig) waren Sie zuletzt beschäftigt?<br><input type="checkbox"/> Arbeiter<br><input type="checkbox"/> Angestellter<br><input type="checkbox"/> Beamter<br><input type="checkbox"/> Selbstständig<br><input type="checkbox"/> Sonstiges, nämlich: ..... |
|-----------|---------------------------------------------------------------------------------------------------------------------------------------------------------------------------------------------------------------------------------------------------------------------------------------------------------------------------------------|

|            |                                                                                                                                                                                                                                                             |
|------------|-------------------------------------------------------------------------------------------------------------------------------------------------------------------------------------------------------------------------------------------------------------|
| <b>10.</b> | Waren Sie in den letzten 5 Jahren einmal arbeitslos?<br><input type="checkbox"/> nein<br><input type="checkbox"/> ja, und zwar insgesamt:  _ _  Jahre  _ _  Monate<br><br>Zuletzt arbeitslos von:  _ _ .      (Monat/Jahr)<br>bis:  _ _ .      (Monat/Jahr) |
|------------|-------------------------------------------------------------------------------------------------------------------------------------------------------------------------------------------------------------------------------------------------------------|

**11.**

Wie würden Sie Ihre **körperliche Beanspruchung** durch Ihre **Haupttätigkeit** (berufliche Tätigkeit, Ausbildung oder Haushalt) in verschiedenen Lebensabschnitten charakterisieren?

Bitte kreuzen Sie für jede Altersstufe bis einschließlich Ihrer jetzigen Altersstufe die am ehesten zutreffende Kategorie an.

|                    | <b>körperlich anstrengende Tätigkeit<br/>(z.B. im Baugewerbe,-<br/>in der Landwirtschaft)</b> | <b>körperlich leichte bis mäßig schwere Tätigkeit</b> | <b>körperlich nicht anstrengende Tätigkeit (z.B. über-<br/>wiegend sitzende Tätigkeit)</b> |
|--------------------|-----------------------------------------------------------------------------------------------|-------------------------------------------------------|--------------------------------------------------------------------------------------------|
| 15-19 Jahre        | <input type="checkbox"/>                                                                      | <input type="checkbox"/>                              | <input type="checkbox"/>                                                                   |
| 20-29 Jahre        | <input type="checkbox"/>                                                                      | <input type="checkbox"/>                              | <input type="checkbox"/>                                                                   |
| 30-39 Jahre        | <input type="checkbox"/>                                                                      | <input type="checkbox"/>                              | <input type="checkbox"/>                                                                   |
| 40-49 Jahre        | <input type="checkbox"/>                                                                      | <input type="checkbox"/>                              | <input type="checkbox"/>                                                                   |
| 50-59 Jahre        | <input type="checkbox"/>                                                                      | <input type="checkbox"/>                              | <input type="checkbox"/>                                                                   |
| 60-70 Jahre        | <input type="checkbox"/>                                                                      | <input type="checkbox"/>                              | <input type="checkbox"/>                                                                   |
| älter als 70 Jahre | <input type="checkbox"/>                                                                      | <input type="checkbox"/>                              | <input type="checkbox"/>                                                                   |

**12.** Wie würden Sie die **psychische, seelische oder nervliche Belastung (Streß)** durch Ihre **Haupttätigkeit** (berufliche Tätigkeit, Ausbildung oder Haushalt) in verschiedenen Lebensabschnitten beurteilen?  
Bitte kreuzen Sie für jede Altersstufe bis einschließlich Ihrer jetzigen Altersstufe die am ehesten zutreffende Kategorie an.

|                    | <b>starke psychische Belastung (z.B. hoher Zeit- und Leistungsdruck)</b> | <b>mäßige psychische Belastung</b> | <b>geringe psychische Belastung</b> |
|--------------------|--------------------------------------------------------------------------|------------------------------------|-------------------------------------|
| 15-19 Jahre        | <input type="checkbox"/>                                                 | <input type="checkbox"/>           | <input type="checkbox"/>            |
| 20-29 Jahre        | <input type="checkbox"/>                                                 | <input type="checkbox"/>           | <input type="checkbox"/>            |
| 30-39 Jahre        | <input type="checkbox"/>                                                 | <input type="checkbox"/>           | <input type="checkbox"/>            |
| 40-49 Jahre        | <input type="checkbox"/>                                                 | <input type="checkbox"/>           | <input type="checkbox"/>            |
| 50-59 Jahre        | <input type="checkbox"/>                                                 | <input type="checkbox"/>           | <input type="checkbox"/>            |
| 60-70 Jahre        | <input type="checkbox"/>                                                 | <input type="checkbox"/>           | <input type="checkbox"/>            |
| älter als 70 Jahre | <input type="checkbox"/>                                                 | <input type="checkbox"/>           | <input type="checkbox"/>            |

**13.** Wie würden Sie die **Zufriedenheit** mit Ihrer **Haupttätigkeit** (berufliche Tätigkeit, Ausbildung oder Haushalt) in verschiedenen Lebensabschnitten beurteilen?  
Bitte kreuzen Sie für jede Altersstufe bis einschließlich Ihrer jetzigen Altersstufe die am ehesten zutreffende Kategorie an.

|                    | <b>sehr zufrieden</b>    | <b>eher zufrieden</b>    | <b>eher unzufrieden</b>  | <b>sehr unzufrieden</b>  |
|--------------------|--------------------------|--------------------------|--------------------------|--------------------------|
| 15-19 Jahre        | <input type="checkbox"/> | <input type="checkbox"/> | <input type="checkbox"/> | <input type="checkbox"/> |
| 20-29 Jahre        | <input type="checkbox"/> | <input type="checkbox"/> | <input type="checkbox"/> | <input type="checkbox"/> |
| 30-39 Jahre        | <input type="checkbox"/> | <input type="checkbox"/> | <input type="checkbox"/> | <input type="checkbox"/> |
| 40-49 Jahre        | <input type="checkbox"/> | <input type="checkbox"/> | <input type="checkbox"/> | <input type="checkbox"/> |
| 50-59 Jahre        | <input type="checkbox"/> | <input type="checkbox"/> | <input type="checkbox"/> | <input type="checkbox"/> |
| 60-70 Jahre        | <input type="checkbox"/> | <input type="checkbox"/> | <input type="checkbox"/> | <input type="checkbox"/> |
| älter als 70 Jahre | <input type="checkbox"/> | <input type="checkbox"/> | <input type="checkbox"/> | <input type="checkbox"/> |

## 5. Ihre Lebensgewohnheiten

### Körperliche Aktivität in der Freizeit

1. In welchem Umfang haben Sie im Laufe Ihres Lebens während Ihrer Freizeit im Durchschnitt **körperlich anstrengende, schweißtreibende** Aktivitäten (z.B. Radfahren, zügiges Wandern, Gartenarbeit, Sport) ausgeübt?

Bitte kreuzen Sie für jede Altersstufe bis einschließlich Ihrer jetzigen Altersstufe die am ehesten zutreffende Kategorie an.

|                    | täglich                  | 5-6 mal/<br>Woche        | 2-4 mal/<br>Woche        | 1 mal/<br>Woche          | 1-3 mal/<br>Monat        | selten/nie               |
|--------------------|--------------------------|--------------------------|--------------------------|--------------------------|--------------------------|--------------------------|
| 15-19 Jahre        | <input type="checkbox"/> | <input type="checkbox"/> | <input type="checkbox"/> | <input type="checkbox"/> | <input type="checkbox"/> | <input type="checkbox"/> |
| 20-29 Jahre        | <input type="checkbox"/> | <input type="checkbox"/> | <input type="checkbox"/> | <input type="checkbox"/> | <input type="checkbox"/> | <input type="checkbox"/> |
| 30-39 Jahre        | <input type="checkbox"/> | <input type="checkbox"/> | <input type="checkbox"/> | <input type="checkbox"/> | <input type="checkbox"/> | <input type="checkbox"/> |
| 40-49 Jahre        | <input type="checkbox"/> | <input type="checkbox"/> | <input type="checkbox"/> | <input type="checkbox"/> | <input type="checkbox"/> | <input type="checkbox"/> |
| 50-59 Jahre        | <input type="checkbox"/> | <input type="checkbox"/> | <input type="checkbox"/> | <input type="checkbox"/> | <input type="checkbox"/> | <input type="checkbox"/> |
| 60-70 Jahre        | <input type="checkbox"/> | <input type="checkbox"/> | <input type="checkbox"/> | <input type="checkbox"/> | <input type="checkbox"/> | <input type="checkbox"/> |
| älter als 70 Jahre | <input type="checkbox"/> | <input type="checkbox"/> | <input type="checkbox"/> | <input type="checkbox"/> | <input type="checkbox"/> | <input type="checkbox"/> |

2. In welchem Umfang haben Sie **innerhalb des letzten Jahres** während Ihrer Freizeit im Durchschnitt **körperlich anstrengende, schweißtreibende** Aktivitäten (z.B. Radfahren, zügiges Wandern, Gartenarbeit, Sport) ausgeübt?

Lassen Sie dabei Zeiten von Krankenhausaufenthalten unberücksichtigt.

Durchschnittlich    Stunden pro Woche.

## Gewicht

3.

Bitte versuchen Sie sich einmal zu erinnern, wie viel Sie während der angegebenen Altersspannen gewogen haben.

Bitte machen Sie Angaben zu Ihrem **geringsten** und **höchsten** Gewicht (ohne Schuhe) für jede Altersstufe bis einschließlich Ihrer jetzigen Altersstufe und runden Sie dabei auf ganze Zahlen. Sollte Ihr Gewicht nicht geschwankt haben, tragen Sie bitte in beide Spalten das gleiche Gewicht ein.

*Für Frauen:* Zeiten der Schwangerschaft sollten für die Gewichtsangaben unberücksichtigt bleiben.

|                    | <b>geringstes<br/>Gewicht</b> | <b>höchstes<br/>Gewicht</b> |  |
|--------------------|-------------------------------|-----------------------------|--|
| 20-29 Jahre        | _ _ _  kg                     | _ _ _  kg                   |  |
| 30-39 Jahre        | _ _ _  kg                     | _ _ _  kg                   |  |
| 40-49 Jahre        | _ _ _  kg                     | _ _ _  kg                   |  |
| 50-59 Jahre        | _ _ _  kg                     | _ _ _  kg                   |  |
| 60-70 Jahre        | _ _ _  kg                     | _ _ _  kg                   |  |
| älter als 70 Jahre | _ _ _  kg                     | _ _ _  kg                   |  |

4.

Wie häufig haben Sie seit Ihrem 20. Lebensjahr **willentlich (durch Diät)** um mehr als 5 kg innerhalb von weniger als 12 Monaten abgenommen?

Bitte geben Sie die bestmögliche Schätzung für jede Altersstufe einschließlich Ihrer jetzigen Altersstufe an, und zwar unabhängig davon, wie lange die Gewichtsabnahme angehalten hat. Haben Sie in einer Altersstufe keine Diät gemacht, tragen Sie bitte eine 0 ein.

|                    |            |
|--------------------|------------|
| 20-29 Jahre        | _ _ _  mal |
| 30-39 Jahre        | _ _ _  mal |
| 40-49 Jahre        | _ _ _  mal |
| 50-59 Jahre        | _ _ _  mal |
| 60-70 Jahre        | _ _ _  mal |
| älter als 70 Jahre | _ _ _  mal |

5.

Wie viel haben Sie vor 12 Monaten gewogen (ohne Schuhe)?

|\_|\_|\_| kg

Haben Sie innerhalb der letzten 12 Monate um mehr als 1 kg zugenommen oder abgenommen?

zugenommen und zwar um |\_|\_| kg

weder noch

abgenommen und zwar um |\_|\_| kg

Wie groß sind Sie (ohne Schuhe)? |\_|\_|\_| cm

**Rauchen**

**Zigaretten**

6. Haben Sie in Ihrem Leben jemals **regelmäßig** Zigaretten geraucht?  
(mindestens eine Zigarette pro Tag)

ja

nein *In diesem Fall machen Sie bitte weiter mit **Frage 13***

7. Wie alt waren Sie, als Sie begonnen haben, regelmäßig Zigaretten zu rauchen?

|\_|\_| Jahre

8. Haben Sie **aufgehört**, regelmäßig Zigaretten zu rauchen?

ja

nein *In diesem Fall machen Sie bitte weiter mit **Frage 12***

9. Wann haben Sie zuletzt aufgehört, regelmäßig Zigaretten zu rauchen?

innerhalb des letzten Monats

vor 1-3 Monaten

vor 4-6 Monaten

vor 7-12 Monaten

vor mehr als 12 Monaten, und zwar im Alter von |\_|\_| Jahren.

|            |                                                                                                                                                                                                                                                                                                                                                                                                                                                                                                                                                                                                                                                                                                                                                                                     |
|------------|-------------------------------------------------------------------------------------------------------------------------------------------------------------------------------------------------------------------------------------------------------------------------------------------------------------------------------------------------------------------------------------------------------------------------------------------------------------------------------------------------------------------------------------------------------------------------------------------------------------------------------------------------------------------------------------------------------------------------------------------------------------------------------------|
| <b>10.</b> | <p>Was war der <b>wichtigste</b> Grund für Sie, mit dem Rauchen aufzuhören? (Bitte nur eine, die am ehesten zutreffende Antwort ankreuzen)</p> <p><input type="checkbox"/> eine akut aufgetretene Erkrankung, nämlich: .....</p> <p><input type="checkbox"/> eine seit längerem (mindestens 12 Monate) bestehende, chronische Erkrankung, nämlich: .....</p> <p><input type="checkbox"/> der Wunsch, möglichen Erkrankungen durch das Zigarettenrauchen vorzubeugen</p> <p><input type="checkbox"/> das Drängen von Angehörigen, Bekannten oder Freunden</p> <p><input type="checkbox"/> die Zigaretten haben mir nicht mehr geschmeckt</p> <p><input type="checkbox"/> die finanziellen Kosten des Rauchens</p> <p><input type="checkbox"/> ein sonstiger Grund, nämlich .....</p> |
|------------|-------------------------------------------------------------------------------------------------------------------------------------------------------------------------------------------------------------------------------------------------------------------------------------------------------------------------------------------------------------------------------------------------------------------------------------------------------------------------------------------------------------------------------------------------------------------------------------------------------------------------------------------------------------------------------------------------------------------------------------------------------------------------------------|

|            |                                                                                                                                                        |
|------------|--------------------------------------------------------------------------------------------------------------------------------------------------------|
| <b>11.</b> | <p>Wie viele Zigaretten pro Tag haben Sie während der Zeit Ihres <b>regelmäßigen Rauchens</b> durchschnittlich geraucht?</p> <p>    Zigaretten/Tag</p> |
|------------|--------------------------------------------------------------------------------------------------------------------------------------------------------|

|            |                                                                                                                                                                                                                                                                                                                       |
|------------|-----------------------------------------------------------------------------------------------------------------------------------------------------------------------------------------------------------------------------------------------------------------------------------------------------------------------|
| <b>12.</b> | <p>Wie viele Zigaretten haben Sie in den folgenden Zeiträumen durchschnittlich pro Tag geraucht?</p> <p>In den letzten 4 Wochen:     Zigaretten/Tag</p> <p>Innerhalb der letzten 12 Monate:     Zigaretten/Tag</p> <p>Davor, d.h. während der übrigen Zeit Ihres regelmäßigen Rauchens:</p> <p>    Zigaretten/Tag</p> |
|------------|-----------------------------------------------------------------------------------------------------------------------------------------------------------------------------------------------------------------------------------------------------------------------------------------------------------------------|



**Zigarren/Pfeife**

**13.** Haben Sie in Ihrem Leben jemals **regelmäßig** Zigarren oder Pfeife geraucht?  
(mindestens drei Zigarren oder Pfeifen pro Woche)

ja

nein *In diesem Fall machen Sie bitte weiter mit **Frage 16***

**14.** Wie lange haben Sie insgesamt regelmäßig Zigarren oder Pfeife geraucht?

|\_|\_| Jahre |\_|\_| Monate

**15.** Wie viele Zigarren oder Pfeifen haben Sie während dieser Zeit durchschnittlich pro Woche geraucht?

|\_|\_|\_| Zigarren/Pfeifen pro Woche.

**Alkohol**

- 16.** Bitte versuchen Sie sich einmal zu erinnern, welche Mengen der folgenden alkoholischen Getränke Sie **im Laufe Ihres bisherigen Lebens** im Durchschnitt **pro Woche** getrunken haben.  
Bitte geben Sie für jede Altersstufe bis einschließlich Ihrer jetzigen Altersstufe die bestmögliche Schätzung an und runden Sie die Gläser bzw. Flaschen pro Woche dabei auf ganze Zahlen.

**Wein, Sekt, Obstwein (Most)**

|                    |                      |                          |
|--------------------|----------------------|--------------------------|
| 15-19 Jahre        | <input type="text"/> | Gläser (1/4 l) pro Woche |
| 20-29 Jahre        | <input type="text"/> | Gläser (1/4 l) pro Woche |
| 30-39 Jahre        | <input type="text"/> | Gläser (1/4 l) pro Woche |
| 40-49 Jahre        | <input type="text"/> | Gläser (1/4 l) pro Woche |
| 50-59 Jahre        | <input type="text"/> | Gläser (1/4 l) pro Woche |
| 60-70 Jahre        | <input type="text"/> | Gläser (1/4 l) pro Woche |
| älter als 70 Jahre | <input type="text"/> | Gläser (1/4 l) pro Woche |

**Bier**

|                    |                      |                            |
|--------------------|----------------------|----------------------------|
| 15-19 Jahre        | <input type="text"/> | Flaschen (0,5 l) pro Woche |
| 20-29 Jahre        | <input type="text"/> | Flaschen (0,5 l) pro Woche |
| 30-39 Jahre        | <input type="text"/> | Flaschen (0,5 l) pro Woche |
| 40-49 Jahre        | <input type="text"/> | Flaschen (0,5 l) pro Woche |
| 50-59 Jahre        | <input type="text"/> | Flaschen (0,5 l) pro Woche |
| 60-70 Jahre        | <input type="text"/> | Flaschen (0,5 l) pro Woche |
| älter als 70 Jahre | <input type="text"/> | Flaschen (0,5 l) pro Woche |

**Hochprozentige alkoholische Getränke (Schnaps, Likör, Rum, Weinbrand...)**

|                    |                      |                         |
|--------------------|----------------------|-------------------------|
| 15-19 Jahre        | <input type="text"/> | Gläser (2 cl) pro Woche |
| 20-29 Jahre        | <input type="text"/> | Gläser (2 cl) pro Woche |
| 30-39 Jahre        | <input type="text"/> | Gläser (2 cl) pro Woche |
| 40-49 Jahre        | <input type="text"/> | Gläser (2 cl) pro Woche |
| 50-59 Jahre        | <input type="text"/> | Gläser (2 cl) pro Woche |
| 60-70 Jahre        | <input type="text"/> | Gläser (2 cl) pro Woche |
| älter als 70 Jahre | <input type="text"/> | Gläser (2 cl) pro Woche |

**17.** Welche Mengen der folgenden alkoholischen Getränke haben Sie **innerhalb der letzten 12 Monate** im Durchschnitt getrunken?

Bitte geben Sie für jeden Zeitraum die bestmögliche Schätzung an und runden Sie die Gläser bzw. Flaschen pro Woche dabei auf ganze Zahlen.

**Wein, Sekt, Obstwein (Most)**

Innerhalb der letzten Woche     Gläser (1/4 l)

Innerhalb der letzten 4 Wochen     Gläser (1/4 l) **pro Woche**

Innerhalb der letzten 12 Monate     Gläser (1/4 l) **pro Woche**

**Bier**

Innerhalb der letzten Woche     Flaschen (0,5 l)

Innerhalb der letzten 4 Wochen     Flaschen (0,5 l) **pro Woche**

Innerhalb der letzten 12 Monate     Flaschen (0,5 l) **pro Woche**

**Hochprozentige alkoholische Getränke (Schnaps, Likör, Rum, Weinbrand, u.ä.)**

Innerhalb der letzten Woche     Gläser (2 cl)

Innerhalb der letzten 4 Wochen     Gläser (2 cl) **pro Woche**

Innerhalb der letzten 12 Monate     Gläser (2 cl) **pro Woche**

**Ernährung**

**18.** Wie oft haben Sie die folgenden Nahrungsmittel **in den letzten 12 Monaten** vor Ihrer stationären Aufnahme im Akutkrankenhaus zu sich genommen? Denken Sie bitte bei der Beantwortung dieser Frage an alle Mahlzeiten, also an **Frühstück, Mittagessen, Abendessen** und an alle **Zwischenmahlzeiten**.

Bitte geben Sie für jede Lebensmittelgruppe an, wie viele Portionen Sie im Durchschnitt davon verzehrt haben und in welchem Zeitraum Sie die angegebene Anzahl Portionen verzehrt haben.

Falls sich Ihre Ernährungsgewohnheiten innerhalb dieses Jahres geändert haben, so bilden Sie bitte den Durchschnitt über das ganze Jahr.

Im folgenden zeigen wir Ihnen in 3 möglichen Beispielen, wie Sie die Eintragungen vornehmen sollten:

**Beispiel 1:** Sie haben im Durchschnitt morgens 2 Scheiben Brot und abends 2 Scheiben Brot, also insgesamt 4 Scheiben am Tag gegessen. Dann tragen Sie bitte unter **Anzahl der Portionen 4** ein und kreuzen **pro Tag** an (siehe unten).

**Beispiel 2:** Sie haben im Durchschnitt 2 mal in der Woche Reis, einmal 1 Portion und einmal 2 Portionen, also insgesamt 3 Portionen in der Woche gegessen. Dann tragen Sie bitte unter **Anzahl der Portionen 3** ein und kreuzen **pro Woche** an (siehe unten).

**Beispiel 3:** Sie haben ungefähr 3 mal im Monat jeweils 2 Gläser Wein, also insgesamt 6 Gläser Wein im Monat getrunken. Dann tragen Sie bitte unter **Anzahl der Portionen 6** ein und kreuzen **pro Monat** an (siehe unten).

|                                                        | Anzahl der Portionen, Gläser, etc. | In welchem Zeitraum?                |                                     |                          |                          |
|--------------------------------------------------------|------------------------------------|-------------------------------------|-------------------------------------|--------------------------|--------------------------|
|                                                        |                                    | pro Tag                             | pro Woche                           | pro Monat                | nie                      |
| <b>Beispiele (1-3)</b>                                 |                                    |                                     |                                     |                          |                          |
| 1. Brot, Brötchen<br>(1 Scheibe bzw. 1 Brötchen)       | 3                                  | <input checked="" type="checkbox"/> | <input type="checkbox"/>            | <input type="checkbox"/> | <input type="checkbox"/> |
| 2. Reis, Grünkern, Hirse,<br>etc. (1 Portion)          | 1                                  | <input type="checkbox"/>            | <input checked="" type="checkbox"/> | <input type="checkbox"/> | <input type="checkbox"/> |
| 3. Wein, Sekt, Obstwein<br>(Most) (1 Glas, ca. 0,25 l) | 2                                  | <input type="checkbox"/>            | <input checked="" type="checkbox"/> | <input type="checkbox"/> | <input type="checkbox"/> |
| <b>Obst und Gemüse</b>                                 |                                    |                                     |                                     |                          |                          |
| Frisches Obst<br>(1 Stück bzw. 1 Portion)              |                                    | <input type="checkbox"/>            | <input type="checkbox"/>            | <input type="checkbox"/> | <input type="checkbox"/> |
| Salat oder Gemüse, roh<br>(1 Portion)                  |                                    | <input type="checkbox"/>            | <input type="checkbox"/>            | <input type="checkbox"/> | <input type="checkbox"/> |
| Gemüse, gekocht<br>(1 Portion)                         |                                    | <input type="checkbox"/>            | <input type="checkbox"/>            | <input type="checkbox"/> | <input type="checkbox"/> |

|                                      | <i>Fortsetzung Frage 18</i>                                                            | <b>Anzahl der Portionen, Gläser, etc.</b> | <b>In welchem Zeitraum?</b> |                          |                          |                          |
|--------------------------------------|----------------------------------------------------------------------------------------|-------------------------------------------|-----------------------------|--------------------------|--------------------------|--------------------------|
|                                      |                                                                                        |                                           | <b>pro Tag</b>              | <b>pro Woche</b>         | <b>pro Monat</b>         | <b>nie</b>               |
| <b><i>Fleisch und Wurstwaren</i></b> |                                                                                        |                                           |                             |                          |                          |                          |
|                                      | Fleisch inkl. Geflügel, ohne Wurstwaren (1 Portion, ca. 150 g)                         |                                           | <input type="checkbox"/>    | <input type="checkbox"/> | <input type="checkbox"/> | <input type="checkbox"/> |
|                                      | magere Wurst (z.B. Geflügelwurst, gekochter Schinken, etc.) (1 Scheibe bzw. 1 Portion) |                                           | <input type="checkbox"/>    | <input type="checkbox"/> | <input type="checkbox"/> | <input type="checkbox"/> |
|                                      | sonstige Wurst (1 Scheibe bzw. 1 Portion)                                              |                                           | <input type="checkbox"/>    | <input type="checkbox"/> | <input type="checkbox"/> | <input type="checkbox"/> |
|                                      | Fisch (1 Portion, ca. 200 g)                                                           |                                           | <input type="checkbox"/>    | <input type="checkbox"/> | <input type="checkbox"/> | <input type="checkbox"/> |
| <b><i>Beilagen</i></b>               |                                                                                        |                                           |                             |                          |                          |                          |
|                                      | Salzkartoffeln, Knödel (1 Portion)                                                     |                                           | <input type="checkbox"/>    | <input type="checkbox"/> | <input type="checkbox"/> | <input type="checkbox"/> |
|                                      | Pommes frites, Kroketten, Bratkartoffeln (1 Portion)                                   |                                           | <input type="checkbox"/>    | <input type="checkbox"/> | <input type="checkbox"/> | <input type="checkbox"/> |
|                                      | Nudeln, Spätzle (1 Portion)                                                            |                                           | <input type="checkbox"/>    | <input type="checkbox"/> | <input type="checkbox"/> | <input type="checkbox"/> |
|                                      | Reis, Grünkern, Hirse, etc. (1 Portion)                                                |                                           | <input type="checkbox"/>    | <input type="checkbox"/> | <input type="checkbox"/> | <input type="checkbox"/> |
| <b><i>Getreideerzeugnisse</i></b>    |                                                                                        |                                           |                             |                          |                          |                          |
|                                      | Vollkornbrot, -brötchen (1 Scheibe bzw. 1 Brötchen)                                    |                                           | <input type="checkbox"/>    | <input type="checkbox"/> | <input type="checkbox"/> | <input type="checkbox"/> |
|                                      | Brot, Brötchen (1 Scheibe bzw. 1 Brötchen)                                             |                                           | <input type="checkbox"/>    | <input type="checkbox"/> | <input type="checkbox"/> | <input type="checkbox"/> |
|                                      | Haferflocken, Müsli, Cornflakes (1 Portion)                                            |                                           | <input type="checkbox"/>    | <input type="checkbox"/> | <input type="checkbox"/> | <input type="checkbox"/> |

| <i>Fortsetzung Frage 18</i>                                                  | <b>Anzahl der Portionen, Gläser, etc.</b> | <b>In welchem Zeitraum?</b> |                          |                          |                          |
|------------------------------------------------------------------------------|-------------------------------------------|-----------------------------|--------------------------|--------------------------|--------------------------|
|                                                                              |                                           | <b>pro Tag</b>              | <b>pro Woche</b>         | <b>pro Monat</b>         | <b>nie</b>               |
| <b><i>Eier, Milch und Milchprodukte</i></b>                                  |                                           |                             |                          |                          |                          |
| Eier (1 Ei)                                                                  |                                           | <input type="checkbox"/>    | <input type="checkbox"/> | <input type="checkbox"/> | <input type="checkbox"/> |
| Milch, Kakao<br>(1 Glas, ca. 0,2 l)                                          |                                           | <input type="checkbox"/>    | <input type="checkbox"/> | <input type="checkbox"/> | <input type="checkbox"/> |
| Halbfettmargarine<br>(1 Portion, ca. 10 g)                                   |                                           | <input type="checkbox"/>    | <input type="checkbox"/> | <input type="checkbox"/> | <input type="checkbox"/> |
| Butter, sonstige Margarine<br>(1 Portion, ca. 10 g)                          |                                           | <input type="checkbox"/>    | <input type="checkbox"/> | <input type="checkbox"/> | <input type="checkbox"/> |
| Quark, Joghurt, Dickmilch,<br>Buttermilch<br>(1 Becher, ca. 150 g)           |                                           | <input type="checkbox"/>    | <input type="checkbox"/> | <input type="checkbox"/> | <input type="checkbox"/> |
| geschlagene Sahne<br>(1 Portion)                                             |                                           | <input type="checkbox"/>    | <input type="checkbox"/> | <input type="checkbox"/> | <input type="checkbox"/> |
| Käse mit reduziertem<br>Fettgehalt<br>(1 Scheibe bzw. 1 Portion)             |                                           | <input type="checkbox"/>    | <input type="checkbox"/> | <input type="checkbox"/> | <input type="checkbox"/> |
| sonstiger Käse<br>(1 Scheibe bzw. 1 Portion)                                 |                                           | <input type="checkbox"/>    | <input type="checkbox"/> | <input type="checkbox"/> | <input type="checkbox"/> |
| <b><i>Süßwaren</i></b>                                                       |                                           |                             |                          |                          |                          |
| Pudding, Kompott, Eis<br>(1 Portion)                                         |                                           | <input type="checkbox"/>    | <input type="checkbox"/> | <input type="checkbox"/> | <input type="checkbox"/> |
| Marmelade, Honig<br>(1 Teelöffel)                                            |                                           | <input type="checkbox"/>    | <input type="checkbox"/> | <input type="checkbox"/> | <input type="checkbox"/> |
| Zucker (1 Teelöffel)                                                         |                                           | <input type="checkbox"/>    | <input type="checkbox"/> | <input type="checkbox"/> | <input type="checkbox"/> |
| Schokolade, Pralinen,<br>Schokoriegel (1 Riegel bzw.<br>vergleichbare Menge) |                                           | <input type="checkbox"/>    | <input type="checkbox"/> | <input type="checkbox"/> | <input type="checkbox"/> |
| Kuchen, Gebäck, Kekse<br>(1 Kuchenstück bzw.<br>vergleichbare Menge)         |                                           | <input type="checkbox"/>    | <input type="checkbox"/> | <input type="checkbox"/> | <input type="checkbox"/> |

|                              | <i>Fortsetzung Frage 18</i>                                             | <b>Anzahl der Portionen, Gläser, etc.</b> | <b>In welchem Zeitraum?</b> |                          |                          |                          |
|------------------------------|-------------------------------------------------------------------------|-------------------------------------------|-----------------------------|--------------------------|--------------------------|--------------------------|
|                              |                                                                         |                                           | <b>pro Tag</b>              | <b>pro Woche</b>         | <b>pro Monat</b>         | <b>nie</b>               |
| <b>Salzige Esswaren</b>      |                                                                         |                                           |                             |                          |                          |                          |
|                              | salzige Knabberereien (z.B. Chips) (1 Portion, ca. 100 g)               |                                           | <input type="checkbox"/>    | <input type="checkbox"/> | <input type="checkbox"/> | <input type="checkbox"/> |
|                              | Fertiggerichte (z.B. Suppen, Pizza, Nudelgerichte, etc.) (1 Portion)    |                                           | <input type="checkbox"/>    | <input type="checkbox"/> | <input type="checkbox"/> | <input type="checkbox"/> |
| <b>Alkoholfreie Getränke</b> |                                                                         |                                           |                             |                          |                          |                          |
|                              | Mineralwasser (1 Glas, ca. 0,2 l)                                       |                                           | <input type="checkbox"/>    | <input type="checkbox"/> | <input type="checkbox"/> | <input type="checkbox"/> |
|                              | Kalorienreduzierte Getränke (z.B. Cola light) (1 Glas, ca. 0,2 l)       |                                           | <input type="checkbox"/>    | <input type="checkbox"/> | <input type="checkbox"/> | <input type="checkbox"/> |
|                              | sonstige Erfrischungsgetränke (z.B. Obstsaft, Cola) (1 Glas, ca. 0,2 l) |                                           | <input type="checkbox"/>    | <input type="checkbox"/> | <input type="checkbox"/> | <input type="checkbox"/> |
| <b>Kaffee, Tee</b>           |                                                                         |                                           |                             |                          |                          |                          |
|                              | Kaffee (1 Tasse)                                                        |                                           | <input type="checkbox"/>    | <input type="checkbox"/> | <input type="checkbox"/> | <input type="checkbox"/> |
|                              | Tee (1 Tasse)                                                           |                                           | <input type="checkbox"/>    | <input type="checkbox"/> | <input type="checkbox"/> | <input type="checkbox"/> |
| <b>Alkohol</b>               |                                                                         |                                           |                             |                          |                          |                          |
|                              | Bier (1 Flasche, 0,5 l)                                                 |                                           | <input type="checkbox"/>    | <input type="checkbox"/> | <input type="checkbox"/> | <input type="checkbox"/> |
|                              | Wein, Sekt, Obstwein (Most) (1 Glas, ca. 0,25 l)                        |                                           | <input type="checkbox"/>    | <input type="checkbox"/> | <input type="checkbox"/> | <input type="checkbox"/> |
|                              | Spirituosen (Schnaps, Likör, Weinbrand, u.ä.) (1 Glas, ca. 2 cl)        |                                           | <input type="checkbox"/>    | <input type="checkbox"/> | <input type="checkbox"/> | <input type="checkbox"/> |

|     |                                                                                                                                                                                                                                                                                                                                                                         |
|-----|-------------------------------------------------------------------------------------------------------------------------------------------------------------------------------------------------------------------------------------------------------------------------------------------------------------------------------------------------------------------------|
| 19. | <p>Wenn Sie an die <b>letzten 12 Monate</b> vor Ihrer stationären Aufnahme im Akutkrankenhaus denken, wie sind/waren Sie es gewohnt, zu Hause Ihre Speisen zuzubereiten?</p> <p><input type="checkbox"/> eher deftig, mit viel Soße</p> <p><input type="checkbox"/> eher schonend im eigenen Saft gegart</p> <p><input type="checkbox"/> sonstiges, und zwar: .....</p> |
|-----|-------------------------------------------------------------------------------------------------------------------------------------------------------------------------------------------------------------------------------------------------------------------------------------------------------------------------------------------------------------------------|



## 6. Ihr persönliches Umfeld

1. Welchen Familienstand haben Sie?

- ledig
- verheiratet
- geschieden
- verwitwet

2. Leben Sie mit einem Partner/einer Partnerin zusammen?

- ja
- nein *In diesem Fall machen Sie bitte weiter mit **Frage 4***

3. Welchen **höchsten** Schulabschluss hat **Ihr Partner/Ihre Partnerin**?

- Hauptschule/Volksschule
- Realschule/Mittlere Reife
- Polytechnische Oberschule
- Fachhochschulreife
- Abitur/allgemeine Hochschulreife
- anderen Schulabschluss, welchen: .....
- keinen Schulabschluss

4. Wenn Sie wirklich Hilfe und Unterstützung brauchen, auf wen können Sie sich verlassen? (Bei dieser Frage sind mehrere Angaben möglich)

- Partner/Partnerin
- Kinder
- Eltern/Schwiegereltern
- sonstige Verwandte
- Nachbarn
- Freund/Freundin
- andere, z.B. Kollegen
- niemanden

5. Wie viele Freunde oder Verwandte haben Sie, mit denen Sie sich *eng* verbunden fühlen und mit denen Sie auch persönliche Probleme besprechen können?

(bitte Anzahl eintragen)

6. Wie würden Sie Ihre **Zufriedenheit im privaten Bereich** (Familie, Freizeit) in verschiedenen Lebensabschnitten beurteilen?  
Bitte kreuzen Sie für jede Altersstufe bis einschließlich Ihrer jetzigen Altersstufe die am ehesten zutreffende Kategorie an.

|                    | <b>sehr<br/>zufrieden</b> | <b>eher<br/>zufrieden</b> | <b>eher<br/>unzufrieden</b> | <b>sehr<br/>unzufrieden</b> |
|--------------------|---------------------------|---------------------------|-----------------------------|-----------------------------|
| 20-29 Jahre        | <input type="checkbox"/>  | <input type="checkbox"/>  | <input type="checkbox"/>    | <input type="checkbox"/>    |
| 30-39 Jahre        | <input type="checkbox"/>  | <input type="checkbox"/>  | <input type="checkbox"/>    | <input type="checkbox"/>    |
| 40-49 Jahre        | <input type="checkbox"/>  | <input type="checkbox"/>  | <input type="checkbox"/>    | <input type="checkbox"/>    |
| 50-59 Jahre        | <input type="checkbox"/>  | <input type="checkbox"/>  | <input type="checkbox"/>    | <input type="checkbox"/>    |
| 60-70 Jahre        | <input type="checkbox"/>  | <input type="checkbox"/>  | <input type="checkbox"/>    | <input type="checkbox"/>    |
| älter als 70 Jahre | <input type="checkbox"/>  | <input type="checkbox"/>  | <input type="checkbox"/>    | <input type="checkbox"/>    |

|           |                                                                                                                                                                                                                                                                                                                                                                                                                                                                                                                                                                                                                                                                                                                                                                                                                                                                                                                   |
|-----------|-------------------------------------------------------------------------------------------------------------------------------------------------------------------------------------------------------------------------------------------------------------------------------------------------------------------------------------------------------------------------------------------------------------------------------------------------------------------------------------------------------------------------------------------------------------------------------------------------------------------------------------------------------------------------------------------------------------------------------------------------------------------------------------------------------------------------------------------------------------------------------------------------------------------|
| <b>7.</b> | <p>Wie viele Personen leben derzeit ständig in Ihrem Haushalt, Sie selbst eingeschlossen?</p> <p>    (bitte Anzahl eintragen)</p>                                                                                                                                                                                                                                                                                                                                                                                                                                                                                                                                                                                                                                                                                                                                                                                 |
| <b>8.</b> | <p>Die abschließende Frage nach Ihrem Einkommen wird selbstverständlich, ebenso wie alle anderen Angaben in diesem Fragebogen, streng vertraulich behandelt und nur vollständig anonym ausgewertet.</p> <p>Wie hoch ist Ihr monatliches <b>Netto-Haushaltseinkommen</b>, d.h. das Nettoeinkommen, das Ihnen <i>allen zusammen</i> nach Abzug der Steuern und Sozialabgaben bleibt?</p> <ul style="list-style-type: none"><li><input type="checkbox"/> weniger als 1.000 DM</li><li><input type="checkbox"/> über 1.000, bis zu 2.000 DM</li><li><input type="checkbox"/> über 2.000, bis zu 3.000 DM</li><li><input type="checkbox"/> über 3.000, bis zu 4.000 DM</li><li><input type="checkbox"/> über 4.000, bis zu 5.000 DM</li><li><input type="checkbox"/> über 5.000, bis zu 6.000 DM</li><li><input type="checkbox"/> über 6.000, bis zu 7.000 DM</li><li><input type="checkbox"/> über 7.000 DM</li></ul> |

***Für Ihre Mitarbeit möchten wir uns  
sehr herzlich bedanken!***

Bitte geben Sie nun den ausgefüllten Fragebogen  
bei einem unserer Studienmitarbeiter ab.

Möchten Sie uns noch etwas mitteilen, was Ihnen wichtig erscheint?  
Auf folgenden Zeilen haben Sie Gelegenheit, uns Ihre Meinung mitzuteilen oder  
noch auf Punkte hinzuweisen, die im Fragebogen nicht berücksichtigt wurden:

.....

.....

.....

.....

.....

.....

.....

.....



LANGZEITERFOLGE  
DER  
**KARDIOLOGISCHEN**  
**ANSCHLUSSHEILBEHANDLUNG**

**Patientenfragebogen**

- am Ende der Reha -

ID-Nummer:

Ausgabedatum: |\_|\_|.|\_|\_|.|\_|\_|\_|\_| (Tag.Monat.Jahr)

Rückgabe bis zum: |\_|\_|.|\_|\_|.|\_|\_|\_|\_|

Rückgabe am: |\_|\_|.|\_|\_|.|\_|\_|\_|\_|

## Sehr geehrte Teilnehmerin, sehr geehrter Teilnehmer der **KAROLA-Studie!**

Ihr Aufenthalt hier in der Klinik geht nun bald zu Ende. Wir hoffen, Sie haben sich in der Klinik wohlfühlt und Ihren Gesundheitszustand Ihren Möglichkeiten und Erwartungen entsprechend verbessern können.

Zur Verbesserung von Rehabilitationsmaßnahmen ist es für uns auch sehr wichtig, etwas darüber zu erfahren, wie es Ihnen jetzt, am Ende Ihres stationären Aufenthalts, geht. Wir möchten Ihnen daher im folgenden einige Fragen zum Rehabilitationsverlauf und -ergebnis stellen, so wie sich der Aufenthalt aus Ihrer Sicht darstellt.

Der Fragebogen gliedert sich in die Abschnitte: Gesamteindruck, Ernährung, Gesundheitszustand und seelisches Befinden.

Bitte gehen Sie Frage für Frage sorgfältig durch und beantworten Sie alle Fragen vollständig. Sind Sie sich bei der einen oder anderen Frage nicht ganz sicher, so geben Sie bitte den aus Ihrer Sicht bestmöglichen Schätzwert an. Selbstverständlich werden alle Ihre Angaben streng vertraulich behandelt und ausschließlich in pseudonymisierter Form ausgewertet.

### So wird es gemacht:

Beim Ausfüllen des Bogens machen Sie bitte in die vorgesehenen Kästchen jeweils ein Kreuz

z.B. ich fühle mich angespannt  meistens  gelegentlich  nie

## 1. Ihr Gesamteindruck

1. Wie beurteilen Sie insgesamt den Erfolg Ihres stationären Aufenthalts in dieser Klinik?

- Ich bin insgesamt sehr zufrieden mit dem Rehabilitationsverlauf.  
Meine Erwartungen wurden voll erfüllt
- Ich bin insgesamt zufrieden mit dem Rehabilitationsverlauf
- Ich bin insgesamt nicht besonders zufrieden mit dem Rehabilitationsverlauf
- Ich bin insgesamt unzufrieden mit dem Rehabilitationsverlauf

2. Wie zufrieden waren Sie mit den folgenden Angeboten/Behandlungen in der Klinik?

|                                           | sehr<br>zufrieden        | zufrieden                | nicht besonders<br>zufrieden | unzufrieden              |
|-------------------------------------------|--------------------------|--------------------------|------------------------------|--------------------------|
| ärztliche Betreuung                       | <input type="checkbox"/> | <input type="checkbox"/> | <input type="checkbox"/>     | <input type="checkbox"/> |
| Betreuung durch<br>Schwestern und Pfleger | <input type="checkbox"/> | <input type="checkbox"/> | <input type="checkbox"/>     | <input type="checkbox"/> |
| Bewegungstraining                         | <input type="checkbox"/> | <input type="checkbox"/> | <input type="checkbox"/>     | <input type="checkbox"/> |
| Vorträge/Seminare                         | <input type="checkbox"/> | <input type="checkbox"/> | <input type="checkbox"/>     | <input type="checkbox"/> |
| Mahlzeiten-Angebot                        | <input type="checkbox"/> | <input type="checkbox"/> | <input type="checkbox"/>     | <input type="checkbox"/> |
| Freizeit-Angebot                          | <input type="checkbox"/> | <input type="checkbox"/> | <input type="checkbox"/>     | <input type="checkbox"/> |

3. Haben Sie durch die Reha Anregungen (z.B. zur Ernährung oder zur Lebensweise) erhalten, die Sie zu Hause ausprobieren möchten?

- sehr viele**      **viele**      **wenige**      **keine**
-

## 2. Ihre Ernährung

1. Welche **Kostform** haben Sie während der Reha bekommen? Geben Sie bitte bei Diabetes Kost Ihre BE Zahl. (Es sind mehrere Antworten möglich)

Vollkost                       Schonkost                       Reduktionskost  
 cholesterinarme Kost       Diabetes Kost (|\_|\_|\_| BE)       Vegetarische Kost  
 Sonstiges

Haben Sie während der Reha **Fastentage** (z.B. nur Obst, nur Gemüse) eingelegt?

|                          |                          |                             |                          |
|--------------------------|--------------------------|-----------------------------|--------------------------|
| <b>ja, 1-2 Tage</b>      | <b>ja, 3-4 Tage</b>      | <b>ja, 5 oder mehr Tage</b> | <b>nein, nie</b>         |
| <input type="checkbox"/> | <input type="checkbox"/> | <input type="checkbox"/>    | <input type="checkbox"/> |

2. Wie hat Ihnen das **Mittagessen** in der Regel geschmeckt?

|                          |                          |                            |                                    |
|--------------------------|--------------------------|----------------------------|------------------------------------|
| <b>sehr gut</b>          | <b>gut</b>               | <b>nicht besonders gut</b> | <b>es hat mir nicht geschmeckt</b> |
| <input type="checkbox"/> | <input type="checkbox"/> | <input type="checkbox"/>   | <input type="checkbox"/>           |

3. Für wie wichtig halten Sie die Ernährung für den weiteren Verlauf Ihrer Erkrankung?

|                          |                          |                          |                                |
|--------------------------|--------------------------|--------------------------|--------------------------------|
| <b>sehr wichtig</b>      | <b>wichtig</b>           | <b>nicht so wichtig</b>  | <b>überhaupt nicht wichtig</b> |
| <input type="checkbox"/> | <input type="checkbox"/> | <input type="checkbox"/> | <input type="checkbox"/>       |

4. Wie viele **Zwischenmahlzeiten** (d.h. alle Mahlzeiten, Snacks, etc. zusätzlich zu den Hauptmahlzeiten) haben Sie während der Reha **täglich** im Durchschnitt zu sich genommen?

|                          |                          |                          |                          |                          |                          |                          |                          |
|--------------------------|--------------------------|--------------------------|--------------------------|--------------------------|--------------------------|--------------------------|--------------------------|
| <b>mehr als 6</b>        | <b>6</b>                 | <b>5</b>                 | <b>4</b>                 | <b>3</b>                 | <b>2</b>                 | <b>1</b>                 | <b>keine</b>             |
| <input type="checkbox"/> | <input type="checkbox"/> | <input type="checkbox"/> | <input type="checkbox"/> | <input type="checkbox"/> | <input type="checkbox"/> | <input type="checkbox"/> | <input type="checkbox"/> |



|      |                                                                                                                                                                                   |                                      |                                          |                                     |
|------|-----------------------------------------------------------------------------------------------------------------------------------------------------------------------------------|--------------------------------------|------------------------------------------|-------------------------------------|
| 5.   | Wie beurteilen Sie die Größe der einzelnen Portionen beim <b>Mittagessen</b> im Vergleich zu den gewohnten Portionen Ihrer Hauptmahlzeit (z.B. Mittag- oder Abendessen) zu Hause? |                                      |                                          |                                     |
|      |                                                                                                                                                                                   | <b>eher kleiner<br/>als zu Hause</b> | <b>etwa gleich groß<br/>wie zu Hause</b> | <b>eher größer<br/>als zu Hause</b> |
|      | Fleisch                                                                                                                                                                           | <input type="checkbox"/>             | <input type="checkbox"/>                 | <input type="checkbox"/>            |
|      | Gemüse                                                                                                                                                                            | <input type="checkbox"/>             | <input type="checkbox"/>                 | <input type="checkbox"/>            |
|      | Salat                                                                                                                                                                             | <input type="checkbox"/>             | <input type="checkbox"/>                 | <input type="checkbox"/>            |
|      | Kartoffeln, Knödel, Nudeln,<br>Spätzle, Reis                                                                                                                                      | <input type="checkbox"/>             | <input type="checkbox"/>                 | <input type="checkbox"/>            |
| Soße | <input type="checkbox"/>                                                                                                                                                          | <input type="checkbox"/>             | <input type="checkbox"/>                 |                                     |

6. Wie oft haben Sie die folgenden Nahrungsmittel während der Reha zu sich genommen? Denken Sie bitte bei der Beantwortung dieser Frage an alle Mahlzeiten, also an **Frühstück, Mittagessen, Abendessen** und an alle **Zwischenmahlzeiten**.

Bitte geben Sie für jede Lebensmittelgruppe an, wie viele Portionen Sie im Durchschnitt davon verzehrt haben und in welchem Zeitraum Sie die angegebene Anzahl Portionen verzehrt haben. Im folgenden zeigen wir Ihnen in 3 möglichen Beispielen, wie Sie die Eintragungen vornehmen sollten:

**Beispiel 1:** Während der Reha haben Sie im Durchschnitt morgens 2 Scheiben Graubrot und abends 1 Scheibe Graubrot gegessen, also insgesamt 3 Scheiben am Tag. Dann tragen Sie bitte unter **Anzahl der Portionen** 3 ein und kreuzen **pro Tag** an (siehe unten).

**Beispiel 2:** Sie haben ungefähr 2x in der Woche, jeweils 1 Becher Joghurt gegessen, also insgesamt 2 Becher Joghurt in der Woche. Dann tragen Sie bitte unter **Anzahl der Portionen** 2 ein und kreuzen **pro Woche** an (siehe unten).

**Beispiel 3:** Sie haben einmal während der gesamten Reha 1 Glas Wein getrunken. Dann tragen Sie bitte unter **Anzahl der Portionen** 1 ein und kreuzen **während der gesamten Reha** an (siehe unten).

| <i>Beispiele (1-3)</i>                                                | Anzahl der Portionen, Gläser, etc. | In welchem Zeitraum?                |                                     |                                     |                          | nie |
|-----------------------------------------------------------------------|------------------------------------|-------------------------------------|-------------------------------------|-------------------------------------|--------------------------|-----|
|                                                                       |                                    | pro Tag                             | pro Woche                           | während der gesamten Reha           |                          |     |
| 1. Brot, Brötchen<br>(1 Scheibe bzw. 1 Brötchen)                      | 3                                  | <input checked="" type="checkbox"/> | <input type="checkbox"/>            | <input type="checkbox"/>            | <input type="checkbox"/> |     |
| 2. Quark, Joghurt,<br>Dickmilch, Buttermilch<br>(1 Becher, ca. 150 g) | 2                                  | <input type="checkbox"/>            | <input checked="" type="checkbox"/> | <input type="checkbox"/>            | <input type="checkbox"/> |     |
| 3. Wein, Sekt, Obstwein<br>(Most) (1 Glas, ca. 0,25 l)                | 1                                  | <input type="checkbox"/>            | <input type="checkbox"/>            | <input checked="" type="checkbox"/> | <input type="checkbox"/> |     |

| <i>Fortsetzung Frage 6</i>                                                             | Anzahl der Portionen, Gläser, etc. In welchem Zeitraum?<br>pro Tag pro Woche während der gesamten Reha nie |                          |                          |                          |                          |
|----------------------------------------------------------------------------------------|------------------------------------------------------------------------------------------------------------|--------------------------|--------------------------|--------------------------|--------------------------|
| <b><i>Fleisch und Wurstwaren</i></b>                                                   |                                                                                                            |                          |                          |                          |                          |
| Fleisch inkl. Geflügel, ohne Wurstwaren (1 Portion, ca.150 g)                          | _ _                                                                                                        | <input type="checkbox"/> | <input type="checkbox"/> | <input type="checkbox"/> | <input type="checkbox"/> |
| magere Wurst (z.B. Geflügelwurst, gekochter Schinken, etc.) (1 Scheibe bzw. 1 Portion) | _ _                                                                                                        | <input type="checkbox"/> | <input type="checkbox"/> | <input type="checkbox"/> | <input type="checkbox"/> |
| sonstige Wurst (1 Scheibe bzw. 1 Portion)                                              | _ _                                                                                                        | <input type="checkbox"/> | <input type="checkbox"/> | <input type="checkbox"/> | <input type="checkbox"/> |
| Fisch (1 Portion, ca. 200 g)                                                           | _ _                                                                                                        | <input type="checkbox"/> | <input type="checkbox"/> | <input type="checkbox"/> | <input type="checkbox"/> |
| <b><i>Beilagen</i></b>                                                                 |                                                                                                            |                          |                          |                          |                          |
| Salzkartoffeln, Knödel (1 Portion)                                                     | _ _                                                                                                        | <input type="checkbox"/> | <input type="checkbox"/> | <input type="checkbox"/> | <input type="checkbox"/> |
| Pommes frites, Kroketten, Bratkartoffeln (1 Portion)                                   | _ _                                                                                                        | <input type="checkbox"/> | <input type="checkbox"/> | <input type="checkbox"/> | <input type="checkbox"/> |
| Nudeln, Spätzle (1 Portion)                                                            | _ _                                                                                                        | <input type="checkbox"/> | <input type="checkbox"/> | <input type="checkbox"/> | <input type="checkbox"/> |
| Reis, Grünkern, Hirse, etc. (1 Portion)                                                | _ _                                                                                                        | <input type="checkbox"/> | <input type="checkbox"/> | <input type="checkbox"/> | <input type="checkbox"/> |
| <b><i>Eier, Milch, Milchprodukte</i></b>                                               |                                                                                                            |                          |                          |                          |                          |
| Eier (1 Ei)                                                                            | _ _                                                                                                        | <input type="checkbox"/> | <input type="checkbox"/> | <input type="checkbox"/> | <input type="checkbox"/> |
| Milch, Kakao (1 Glas, ca. 0,2 l)                                                       | _ _                                                                                                        | <input type="checkbox"/> | <input type="checkbox"/> | <input type="checkbox"/> | <input type="checkbox"/> |
| Halbfettmargarine (1 Portion, ca. 10 g)                                                | _ _                                                                                                        | <input type="checkbox"/> | <input type="checkbox"/> | <input type="checkbox"/> | <input type="checkbox"/> |
| Butter, sonstige Margarine (1 Portion, ca. 10 g)                                       | _ _                                                                                                        | <input type="checkbox"/> | <input type="checkbox"/> | <input type="checkbox"/> | <input type="checkbox"/> |
| Quark, Joghurt, Dickmilch, Buttermilch (1 Becher, ca. 150 g)                           | _ _                                                                                                        | <input type="checkbox"/> | <input type="checkbox"/> | <input type="checkbox"/> | <input type="checkbox"/> |
| geschlagene Sahne (1 Portion)                                                          | _ _                                                                                                        | <input type="checkbox"/> | <input type="checkbox"/> | <input type="checkbox"/> | <input type="checkbox"/> |
| Käse mit reduziertem Fettgehalt (1 Scheibe bzw. 1 Portion)                             | _ _                                                                                                        | <input type="checkbox"/> | <input type="checkbox"/> | <input type="checkbox"/> | <input type="checkbox"/> |
| sonstiger Käse (1 Scheibe bzw. 1 Portion)                                              | _ _                                                                                                        | <input type="checkbox"/> | <input type="checkbox"/> | <input type="checkbox"/> | <input type="checkbox"/> |

|  |
|--|
|  |
|--|

## Fortsetzung Frage 6

|                                                                              | Anzahl der Portionen, Gläser, etc. | In welchem Zeitraum?     |                          |                           |                          |
|------------------------------------------------------------------------------|------------------------------------|--------------------------|--------------------------|---------------------------|--------------------------|
|                                                                              |                                    | pro Tag                  | pro Woche                | während der gesamten Reha | nie                      |
| <b>Obst und Gemüse</b>                                                       |                                    |                          |                          |                           |                          |
| Frisches Obst<br>(1 Stück bzw. 1 Portion)                                    | _ _                                | <input type="checkbox"/> | <input type="checkbox"/> | <input type="checkbox"/>  | <input type="checkbox"/> |
| Salat oder Gemüse, roh<br>(1 Portion)                                        | _ _                                | <input type="checkbox"/> | <input type="checkbox"/> | <input type="checkbox"/>  | <input type="checkbox"/> |
| Gemüse, gekocht (1 Portion)                                                  | _ _                                | <input type="checkbox"/> | <input type="checkbox"/> | <input type="checkbox"/>  | <input type="checkbox"/> |
| <b>Getreideerzeugnisse</b>                                                   |                                    |                          |                          |                           |                          |
| Vollkornbrot, -brötchen<br>(1 Scheibe bzw. 1 Brötchen)                       | _ _                                | <input type="checkbox"/> | <input type="checkbox"/> | <input type="checkbox"/>  | <input type="checkbox"/> |
| Brot, Brötchen<br>(1 Scheibe bzw. 1 Brötchen)                                | _ _                                | <input type="checkbox"/> | <input type="checkbox"/> | <input type="checkbox"/>  | <input type="checkbox"/> |
| Haferflocken, Müsli,<br>Cornflakes (1 Portion)                               | _ _                                | <input type="checkbox"/> | <input type="checkbox"/> | <input type="checkbox"/>  | <input type="checkbox"/> |
| <b>Süßwaren</b>                                                              |                                    |                          |                          |                           |                          |
| Pudding, Kompott, Eis<br>(1 Portion)                                         | _ _                                | <input type="checkbox"/> | <input type="checkbox"/> | <input type="checkbox"/>  | <input type="checkbox"/> |
| Marmelade, Honig (1 Teelöffel)                                               | _ _                                | <input type="checkbox"/> | <input type="checkbox"/> | <input type="checkbox"/>  | <input type="checkbox"/> |
| Zucker (1 Teelöffel)                                                         | _ _                                | <input type="checkbox"/> | <input type="checkbox"/> | <input type="checkbox"/>  | <input type="checkbox"/> |
| Schokolade, Pralinen,<br>Schokoriegel (1 Riegel bzw.<br>vergleichbare Menge) | _ _                                | <input type="checkbox"/> | <input type="checkbox"/> | <input type="checkbox"/>  | <input type="checkbox"/> |
| Kuchen, Gebäck, Kekse (1<br>Kuchenstück bzw. vergleichbare<br>Menge)         | _ _                                | <input type="checkbox"/> | <input type="checkbox"/> | <input type="checkbox"/>  | <input type="checkbox"/> |
| <b>Salzige Esswaren</b>                                                      |                                    |                          |                          |                           |                          |
| salzige Knabberereien<br>(z.B. Chips) (1 Portion, ca. 100g)                  | _ _                                | <input type="checkbox"/> | <input type="checkbox"/> | <input type="checkbox"/>  | <input type="checkbox"/> |
| Fertiggerichte (z.B. Suppen,<br>Pizza, Nudelgerichte) (1 Port.)              | _ _                                | <input type="checkbox"/> | <input type="checkbox"/> | <input type="checkbox"/>  | <input type="checkbox"/> |

## Fortsetzung Frage 6

|                                                                 | Anzahl der Portionen, Gläser, etc. | In welchem Zeitraum?     |                          |                           |                          |
|-----------------------------------------------------------------|------------------------------------|--------------------------|--------------------------|---------------------------|--------------------------|
|                                                                 |                                    | pro Tag                  | pro Woche                | während der gesamten Reha | nie                      |
| <b>Alkoholfreie Getränke</b>                                    |                                    |                          |                          |                           |                          |
| Mineralwasser (1 Glas, ca. 0,2 l)                               | _ _                                | <input type="checkbox"/> | <input type="checkbox"/> | <input type="checkbox"/>  | <input type="checkbox"/> |
| Kalorienreduzierte Getränke (z.B. Cola light 1 Glas, ca. 0,2 l) | _ _                                | <input type="checkbox"/> | <input type="checkbox"/> | <input type="checkbox"/>  | <input type="checkbox"/> |
| sonstige Erfrischungsgetränke (z.B. Obstsaft, Cola, ca. 0,2 l)  | _ _                                | <input type="checkbox"/> | <input type="checkbox"/> | <input type="checkbox"/>  | <input type="checkbox"/> |
| <b>Kaffee, Tee</b>                                              |                                    |                          |                          |                           |                          |
| Kaffee (1 Tasse)                                                | _ _                                | <input type="checkbox"/> | <input type="checkbox"/> | <input type="checkbox"/>  | <input type="checkbox"/> |
| Tee (1 Tasse)                                                   | _ _                                | <input type="checkbox"/> | <input type="checkbox"/> | <input type="checkbox"/>  | <input type="checkbox"/> |
| <b>Alkohol</b>                                                  |                                    |                          |                          |                           |                          |
| Bier (1 Flasche, 0,5 l)                                         | _ _                                | <input type="checkbox"/> | <input type="checkbox"/> | <input type="checkbox"/>  | <input type="checkbox"/> |
| Wein, Sekt, Obstwein (Most) (1 Glas, ca. 0,25 l)                | _ _                                | <input type="checkbox"/> | <input type="checkbox"/> | <input type="checkbox"/>  | <input type="checkbox"/> |
| Spirituosen (Schnaps, Likör, Weinbrand, u.ä./1 Glas, ca. 2 cl)  | _ _                                | <input type="checkbox"/> | <input type="checkbox"/> | <input type="checkbox"/>  | <input type="checkbox"/> |

|    |                                                                                                                                                                                                                                                                                                                                                                                                                                                    |
|----|----------------------------------------------------------------------------------------------------------------------------------------------------------------------------------------------------------------------------------------------------------------------------------------------------------------------------------------------------------------------------------------------------------------------------------------------------|
| 7. | <p>An welchen Veranstaltungen oder Beratungen zum Thema Ernährung haben Sie während der Reha regelmäßig teilgenommen?</p> <p><input type="checkbox"/> Vorträge zu gesunder Ernährung</p> <p><input type="checkbox"/> Einzelberatung</p> <p><input type="checkbox"/> Diabetikerschulung</p> <p><input type="checkbox"/> Lehrküche, Kochkurs</p> <p><input type="checkbox"/> ich habe an keinen Veranstaltungen zum Thema Ernährung teilgenommen</p> |
|----|----------------------------------------------------------------------------------------------------------------------------------------------------------------------------------------------------------------------------------------------------------------------------------------------------------------------------------------------------------------------------------------------------------------------------------------------------|







## 4. Ihr seelisches Befinden

Bitte beantworten Sie die folgenden Fragen (Nr. 1-14) so, wie es für Sie persönlich **in der letzten Woche** am ehesten zutrif. Machen Sie nur ein Kreuz pro Frage und lassen Sie bitte keine Frage aus. Überlegen Sie bitte nicht lange, sondern wählen Sie die Antwort aus, die Ihnen auf Anhieb am zutreffendsten erscheint.

|    |                                                                                                                                                                                                                                                                                                            |
|----|------------------------------------------------------------------------------------------------------------------------------------------------------------------------------------------------------------------------------------------------------------------------------------------------------------|
| 1. | <b>Ich fühle mich angespannt oder überreizt</b><br><input type="checkbox"/> meistens<br><input type="checkbox"/> oft<br><input type="checkbox"/> von Zeit zu Zeit/gelegentlich<br><input type="checkbox"/> überhaupt nicht                                                                                 |
| 2. | <b>Ich kann mich heute noch so freuen wie früher</b><br><input type="checkbox"/> ganz genau so<br><input type="checkbox"/> nicht ganz so sehr<br><input type="checkbox"/> nur noch ein wenig<br><input type="checkbox"/> kaum oder gar nicht                                                               |
| 3. | <b>Mich überkommt eine ängstliche Vorahnung, dass etwas Schreckliches passieren könnte</b><br><input type="checkbox"/> ja, sehr stark<br><input type="checkbox"/> ja, aber nicht allzu stark<br><input type="checkbox"/> etwas, aber es macht mir keine Sorgen<br><input type="checkbox"/> überhaupt nicht |
| 4. | <b>Ich kann lachen und die lustige Seite der Dinge sehen</b><br><input type="checkbox"/> ja, so viel wie immer<br><input type="checkbox"/> nicht mehr ganz so viel<br><input type="checkbox"/> inzwischen viel weniger<br><input type="checkbox"/> überhaupt nicht                                         |



|    |                                                                                                                                                                                                                                                                                |
|----|--------------------------------------------------------------------------------------------------------------------------------------------------------------------------------------------------------------------------------------------------------------------------------|
| 5. | <b>Mir gehen beunruhigende Gedanken durch den Kopf</b><br><input type="checkbox"/> einen Großteil der Zeit<br><input type="checkbox"/> verhältnismäßig oft<br><input type="checkbox"/> von Zeit zu Zeit, aber nicht allzu oft<br><input type="checkbox"/> nur gelegentlich/nie |
| 6. | <b>Ich fühle mich glücklich</b><br><input type="checkbox"/> überhaupt nicht<br><input type="checkbox"/> selten<br><input type="checkbox"/> manchmal<br><input type="checkbox"/> meistens                                                                                       |
| 7. | <b>Ich kann behaglich dasitzen und mich entspannen</b><br><input type="checkbox"/> ja, natürlich<br><input type="checkbox"/> gewöhnlich schon<br><input type="checkbox"/> nicht oft<br><input type="checkbox"/> überhaupt nicht                                                |
| 8. | <b>Ich fühle mich in meinen Aktivitäten gebremst</b><br><input type="checkbox"/> fast immer<br><input type="checkbox"/> sehr oft<br><input type="checkbox"/> manchmal<br><input type="checkbox"/> überhaupt nicht                                                              |
| 9. | <b>Ich habe manchmal ein ängstliches Gefühl in der Magengegend</b><br><input type="checkbox"/> überhaupt nicht<br><input type="checkbox"/> gelegentlich<br><input type="checkbox"/> ziemlich oft<br><input type="checkbox"/> sehr oft                                          |

|     |                                                                                                                                                                                                                                                                                                                                                    |
|-----|----------------------------------------------------------------------------------------------------------------------------------------------------------------------------------------------------------------------------------------------------------------------------------------------------------------------------------------------------|
| 10. | <b>Ich habe das Interesse an meiner äußeren Erscheinung verloren</b><br><input type="checkbox"/> ja, stimmt genau<br><input type="checkbox"/> ich kümmere mich nicht so sehr darum, wie ich sollte<br><input type="checkbox"/> möglicherweise kümmere ich mich zu wenig darum<br><input type="checkbox"/> ich kümmere mich so viel darum wie immer |
| 11. | <b>Ich fühle mich rastlos, muß immer in Bewegung sein</b><br><input type="checkbox"/> ja, tatsächlich sehr<br><input type="checkbox"/> ziemlich<br><input type="checkbox"/> nicht sehr<br><input type="checkbox"/> überhaupt nicht                                                                                                                 |
| 12. | <b>Ich blicke mit Freude in die Zukunft</b><br><input type="checkbox"/> ja, sehr<br><input type="checkbox"/> eher weniger als früher<br><input type="checkbox"/> viel weniger als früher<br><input type="checkbox"/> kaum bis gar nicht                                                                                                            |
| 13. | <b>Mich überkommt plötzlich ein panikartiger Zustand</b><br><input type="checkbox"/> ja, tatsächlich sehr oft<br><input type="checkbox"/> ziemlich oft<br><input type="checkbox"/> nicht sehr oft<br><input type="checkbox"/> überhaupt nicht                                                                                                      |
| 14. | <b>Ich kann mich an einem guten Buch, einer Radio- oder Fernsehsendung freuen</b><br><input type="checkbox"/> oft<br><input type="checkbox"/> manchmal<br><input type="checkbox"/> eher selten<br><input type="checkbox"/> sehr selten                                                                                                             |

Erinnern Sie sich sonst noch an etwas während Ihres Aufenthaltes hier in der Klinik, was Ihnen wichtig erscheint, im Fragebogen aber nicht berücksichtigt wurde?

Auf folgenden Zeilen haben Sie Gelegenheit, uns Ihre Meinung mitzuteilen oder noch auf Punkte hinzuweisen, die im Fragebogen nicht berücksichtigt wurden:

.....

.....

.....

.....

.....

.....

Bitte geben Sie nun den ausgefüllten Fragebogen bei einem unserer Studienmitarbeiter ab.

***Wir bedanken uns sehr herzlich für Ihre Mitarbeit  
und  
wünschen Ihnen für Ihre Gesundheit alles Gute!***
